# Supplementary material for: Sox9 and Sox8 protect the adult testis from male-to-female genetic reprogramming and complete degeneration
Source: eLife. 2016 Jun 21;5:e15635. doi: 10.7554/eLife.15635 (PMC4945155; doi:10.7554/eLife.15635)
Supplement: Figure 1—source data 1. — DOI: http://dx.doi.org/10.7554/eLife.15635.004 [file elife-15635-fig1-data1.xls]

## Sheet: Sertoli
				Sox9/8 DKO (Sox9)			Sox9/8 DKO (Wt1)			Control TX
			Individual ID	320A	321A	323A	wfst2	362A	360A	364A	340A	318A
				4	6	5	16	16	15	21	22	26
				1	11	12	15	16	18	28	23	23
				1	7	12	15	20	16	25	24	25
				1	7	9	15	12	16	22	20	25
				1	8	6	15	13	15	20	21	26
				10	6	15	14	13	13	24	21	25
				11	8	10	16	8	16	21	20	26
			Number of	9	5	12	15	17	13	28	24	28
			Sertoli cells /	7	4	6	15	10	13	25	27	28
			Testis tubule	10	8	10	16	16	20	18	27	27
				15	3	12	15	5	9	20	27	24
				12	8	12	17	12	15	24	23	26
				12	7	7	17	13	20	22	25	28
				8	8	8	13	18	20	23	29	25
				3	10	7	21	16	19	24	29	27
				3	4	6	19	12	21	20	20	26
				1	8	6	20	14	21	21	28	29
			Pooled means	7.4902			15.3922			24.3137
			stdev	3.61316			3.35904			2.93592
						Variance	Mean
			Sox9/8 DKO (Sox9)			P-Value	P-Value
			Sox9/8 DKO (Wt1)			0.3821	7.16137e-20
						equal	different
						Variance	Mean		2.93592
			Sox9/8 DKO (Sox9)			P-Value	P-Value
			Control TX			0.299	5.24793e-46
						equal	different
						Variance	Mean
			Sox9/8 DKO (Wt1)			P-Value	P-Value
			Control TX			0.9611	6.99497e-26
						equal	different
			Levene test's for variance equality
			Made with leveneTest(y,group) function from "car" R package
			T-tests for mean comparison made in the gnumeric speadsheet
			Two-sample t test power calculation were made with the pwr.t.test() function from the pwr R library

## Sheet: Sox9-Wt1
	Sox9	Wt1
Mean	7.4902	15.3922
Variance	13.0549	11.2831
Observations	51	51
Pooled Variance	12.169
Hypothesized Mean Difference	0
Observed Mean Difference	-7.90196
df	100
t Stat	-11.4387
P (T<=t) one-tail	3.58068e-20
t Critical one-tail	1.66023
P (T<=t) two-tail	7.16137e-20
t Critical two-tail	1.98397
Power analysis:
> pwr.t.test(n=51,d=(7.49-15.39)/sqrt(12.17),power=NULL,sig.level=.05,type="two.sample",alternative="two.sided")
Two-sample t test power calculation
n = 51
d = 2.264549
sig.level = 0.05
power = 1
alternative = two.sided
NOTE: n is number in *each* group

## Sheet: Sox9-Control
	Sox9	Control
Mean	7.4902	24.3137
Variance	13.0549	8.61961
Observations	51	51
Pooled Variance	10.8373
Hypothesized Mean Difference	0
Observed Mean Difference	-16.8235
df	100
t Stat	-25.8064
P (T<=t) one-tail	2.62397e-46
t Critical one-tail	1.66023
P (T<=t) two-tail	5.24793e-46
t Critical two-tail	1.98397
Power analysis:
> pwr.t.test(n=51,d=(7.49-24.31)/sqrt(10.84),power=NULL,sig.level=.05,type="two.sample",alternative="two.sided")
Two-sample t test power calculation
n = 51
d = 5.108711
sig.level = 0.05
power = 1
alternative = two.sided
NOTE: n is number in *each* group

## Sheet: Wt1-Control
	Wt1	Control
Mean	15.3922	24.3137
Variance	11.2831	8.61961
Observations	51	51
Pooled Variance	9.95137
Hypothesized Mean Difference	0
Observed Mean Difference	-8.92157
df	100
t Stat	-14.2814
P (T<=t) one-tail	3.49748e-26
t Critical one-tail	1.66023
P (T<=t) two-tail	6.99497e-26
t Critical two-tail	1.98397
Power analysis:
> pwr.t.test(n=51,d=(15.39-24.31)/sqrt(9.95),power=NULL,sig.level=.05,type="two.sample",alternative="two.sided")
Two-sample t test power calculation
n = 51
d = 2.82783
sig.level = 0.05
power = 1
alternative = two.sided
NOTE: n is number in *each* group
