# Supplementary material for: Sox9 and Sox8 protect the adult testis from male-to-female genetic reprogramming and complete degeneration
Source: eLife. 2016 Jun 21;5:e15635. doi: 10.7554/eLife.15635 (PMC4945155; doi:10.7554/eLife.15635)
Supplement: Figure 5—source data 1. — DOI: http://dx.doi.org/10.7554/eLife.15635.022 [file elife-15635-fig5-data1.xls]

## Sheet: data.csv
V1	V2.x	V2.y
1	0610007P14Rik	1.95452	1.61554
2	0610009B22Rik	-1.26303	-1.1758
3	0610009L18Rik	-1.97322	-2.44927
4	0610010F05Rik	-3.03275	-0.783736
5	0610011F06Rik	2.21137	1.97332
6	0610012G03Rik	0.780966	0.407932
7	0610030E20Rik	-1.23948	-1.555
8	0610040B10Rik	-0.971415	-0.79537
9	1110001J03Rik	2.28316	2.02666
10	1110004E09Rik	-1.46527	-1.30977
11	1110004F10Rik	0.0365367	-0.644129
12	1110006O24Rik	-1.57373	-3.04968
13	1110007C09Rik	2.45052	2.02282
14	1110008F13Rik	2.27728	0.637623
15	1110008P14Rik	3.38407	3.68398
16	1110012L19Rik	2.63721	5.20306
17	1110017D15Rik	-3.80603	-5.32534
18	1110020A21Rik	-3.94816	-5.3362
19	1110032A03Rik	-3.32119	-1.93513
20	1110034G24Rik	2.63488	4.78202
21	1110037F02Rik	-1.70306	0.593206
22	1110038B12Rik	0.726643	0.563784
23	1110038F14Rik	1.76558	1.77776
24	1190002N15Rik	0.267373	2.44886
25	1500009L16Rik	1.52025	2.20862
26	1500011B03Rik	0.826655	1.30922
27	1500011K16Rik	2.90008	3.35574
28	1500015O10Rik	2.18351	5.17548
29	1600002H07Rik	1.79208	3.66447
30	1600014C10Rik	1.90034	3.19269
31	1600014K23Rik	-2.67084	-5.23142
32	1600025M17Rik	-1.67621	-3.03481
33	1700001C02Rik	-3.92199	-5.25007
34	1700001C19Rik	-4.60652	-8.73087
35	1700001G11Rik	-3.08789	-3.26366
36	1700001G17Rik	-1.42202	-3.6553
37	1700001L05Rik	-3.77012	-2.07082
38	1700001L19Rik	-3.659	-5.50626
39	1700001O22Rik	-3.79062	-8.85924
40	1700001P01Rik	-3.75655	-6.63265
41	1700003F12Rik	-4.30864	-7.73511
42	1700003M02Rik	-4.95626	-3.37602
43	1700003P14Rik	-2.54161	-6.47977
44	1700006E09Rik	-4.57857	-7.34103
45	1700007B14Rik	-4.21217	-7.01395
46	1700007G11Rik	-4.30463	-3.34479
47	1700007K09Rik	-4.26407	-6.16616
48	1700007K13Rik	-1.76369	-4.15778
49	1700007L15Rik	-1.92429	-1.95534
50	1700008J07Rik	-3.16114	-3.51779
51	1700008O03Rik	-2.60777	-5.83893
52	1700009N14Rik	-5.27945	-6.67757
53	1700010B08Rik	-4.32667	-3.05897
54	1700010I14Rik	-4.50068	-3.14901
55	1700011B04Rik	-2.09463	-6.23537
56	1700011H14Rik	-4.05888	-5.52751
57	1700011I03Rik	-4.04269	-3.26471
58	1700011L22Rik	-4.38172	-8.15926
59	1700012A03Rik	-4.9075	-10.4695
60	1700012B07Rik	-4.54599	-6.64693
61	1700012B09Rik	-4.33337	-4.39775
62	1700012P22Rik	-4.02314	-6.28623
63	1700013D24Rik	-4.65465	-3.9126
64	1700013F07Rik	-4.39695	-5.65246
65	1700013G24Rik	-5.05559	-7.39566
66	1700013H16Rik	-2.77095	-1.26317
67	1700015E13Rik	-4.5498	-5.84746
68	1700015F17Rik	-4.51306	-6.20272
69	1700015G11Rik	-5.28004	-9.67712
70	1700016C15Rik	-4.87756	-10.5179
71	1700016H13Rik	-5.01315	-10.2084
72	1700016K19Rik	-3.39492	-3.67635
73	1700016P04Rik	-4.62158	-8.68711
74	1700017D01Rik	-5.04509	-5.89663
75	1700017G19Rik	-2.7848	-4.9492
76	1700017N19Rik	-4.39642	-5.76901
77	1700018B08Rik	-4.14245	-5.81332
78	1700018B24Rik	-3.50601	-1.40532
79	1700018C11Rik	-4.73934	-6.01234
80	1700018F24Rik	-3.6087	-3.18932
81	1700018L02Rik	-3.24131	-3.1776
82	1700019A02Rik	-4.72737	-2.88973
83	1700019B03Rik	-3.83837	-7.66084
84	1700019D03Rik	-5.03903	-5.88334
85	1700019G17Rik	-1.15356	1.48023
86	1700019L03Rik	-3.12528	-6.36362
87	1700019M22Rik	-5.33327	-5.29161
88	1700019N19Rik	-4.68824	-7.23938
89	1700020I14Rik	-2.06467	1.86632
90	1700021F07Rik	-4.04533	-4.68898
91	1700021K19Rik	-0.730695	-1.01167
92	1700022A21Rik	-4.29539	-9.09442
93	1700023F06Rik	-4.17331	-5.07234
94	1700024P04Rik	-5.35699	-6.37564
95	1700025G04Rik	-0.358591	2.94969
96	1700026D08Rik	-3.60832	-2.7217
97	1700026L06Rik	-4.04574	-5.09103
98	1700029F12Rik	-4.65355	-2.98897
99	1700029H14Rik	-5.05883	-9.24529
100	1700029I15Rik	-3.64575	-3.35142
101	1700029J07Rik	-3.20167	-3.31606
102	1700029M20Rik	-3.76549	-2.71376
103	1700029P11Rik	-3.81715	-2.35986
104	1700030F18Rik	-3.39974	-4.60179
105	1700030J22Rik	-4.12535	-6.11517
106	1700030K09Rik	-1.71299	-2.02252
107	1700034E13Rik	-5.29599	-7.02248
108	1700034I23Rik	-4.48535	-8.79417
109	1700034O15Rik	-5.07958	-5.73355
110	1700037C18Rik	-2.52607	-4.68678
111	1700040L02Rik	-3.81066	-2.0923
112	1700042G07Rik	-4.90759	-10.1304
113	1700047M11Rik	-2.7306	-2.95838
114	1700048O20Rik	-2.18336	-0.935453
115	1700051A21Rik	-4.13001	-4.36233
116	1700052I22Rik	-4.30438	-5.99379
117	1700052K11Rik	-1.46246	-2.0609
118	1700054K19Rik	-0.400333	-4.93312
119	1700056E22Rik	-2.82338	-6.21693
120	1700057G04Rik	-4.20165	-7.64118
121	1700061F12Rik	-3.75596	-8.0288
122	1700061G19Rik	-3.72593	-7.40631
123	1700063D05Rik	0.797009	-8.29203
124	1700065I16Rik	-3.11966	-3.51768
125	1700066M21Rik	-2.76763	-2.79728
126	1700067P10Rik	-4.15558	-5.84927
127	1700069L16Rik	-1.825	-4.49604
128	1700073E17Rik	-2.32824	-6.20273
129	1700074P13Rik	-5.29314	-2.87839
130	1700080E11Rik	-4.97765	-9.80228
131	1700080O16Rik	-2.80984	-1.90056
132	1700086L19Rik	-4.72927	-4.46407
133	1700088E04Rik	-1.56539	-2.51511
134	1700093K21Rik	-5.08338	-5.79255
135	1700096K18Rik	-0.270524	1.37859
136	1700097N02Rik	-3.52988	-1.58199
137	1700102P08Rik	-3.48379	-2.13252
138	1700108F19Rik	-2.45609	-7.20899
139	1700110I01Rik	-0.47343	-3.18404
140	1700113H08Rik	-3.89017	-5.79431
141	1700120K04Rik	-3.7882	-9.89449
142	1700123K08Rik	-2.27804	-6.18126
143	1700123L14Rik	-4.83648	-3.55413
144	1700125H20Rik	-2.60918	-4.34115
145	1700129C05Rik	-5.47866	-4.05942
146	1810010H24Rik	1.42676	0.710891
147	1810011O10Rik	1.28656	3.31693
148	1810012K16Rik	-1.64107	-3.70518
149	1810013L24Rik	-2.42372	1.17082
150	1810019D21Rik	2.771	6.50977
151	1810022K09Rik	1.89586	2.2359
152	1810030O07Rik	1.00649	4.079
153	1810032O08Rik	0.822493	2.35161
154	1810041L15Rik	-0.0486367	1.44402
155	1810043G02Rik	0.5375	-1.30023
156	1810044D09Rik	-2.30261	-2.15239
157	1810058I24Rik	1.91224	1.89348
158	2010109A12Rik	-2.81624	-5.58536
159	2010111I01Rik	1.02928	1.30758
160	2010204K13Rik	1.61509	2.11546
161	2010315B03Rik	0.0935062	3.55308
162	2010320M18Rik	1.9575	3.23005
163	2200002D01Rik	3.1446	1.94734
164	2200002J24Rik	-1.72463	-3.29853
165	2210011C24Rik	-1.0104	0.878501
166	2210013O21Rik	2.02005	2.90074
167	2210016F16Rik	2.15946	1.90095
168	2210016L21Rik	2.41081	2.45138
169	2210018M11Rik	-1.82848	-0.890427
170	2210408I21Rik	-2.78004	-4.07127
171	2300009A05Rik	-1.3485	-2.25766
172	2310009A05Rik	1.09473	1.15269
173	2310009B15Rik	2.41427	2.61249
174	2310010J17Rik	-1.0875	-0.527112
175	2310015A10Rik	0.607724	2.86103
176	2310022B05Rik	1.47424	1.56881
177	2310030G06Rik	1.12896	4.325
178	2310033P09Rik	1.47752	0.87365
179	2310035C23Rik	-0.958009	1.11739
180	2310036O22Rik	1.14507	0.851711
181	2310039H08Rik	1.24838	0.966807
182	2310057M21Rik	-1.0571	-0.581808
183	2310061I04Rik	-1.05851	-0.915175
184	2410002F23Rik	1.77113	1.58016
185	2410006H16Rik	1.74954	0.856687
186	2410016O06Rik	1.72351	1.6945
187	2410089E03Rik	-2.31755	-1.25864
188	2410131K14Rik	1.27175	2.48461
189	2510009E07Rik	0.577565	3.72576
190	2610001J05Rik	1.09992	1.91491
191	2610005L07Rik	-1.87146	1.78955
192	2610008E11Rik	-0.527706	1.21295
193	2610020H08Rik	-2.95647	-1.16809
194	2610044O15Rik8	-0.014819	2.46198
195	2610301B20Rik	-2.25732	-0.935142
196	2610305D13Rik	-1.66995	1.39814
197	2610318N02Rik	-4.98775	-5.69299
198	2610524H06Rik	1.22433	1.83645
199	2610528A11Rik	-3.82629	-8.46462
200	2700046A07Rik	0.134579	4.54969
201	2700046G09Rik	-1.33504	-1.04211
202	2700049A03Rik	-3.19636	-2.29606
203	2700081O15Rik	1.65955	4.65359
204	2700094K13Rik	3.08184	2.20422
205	2700099C18Rik	-2.0681	-1.0967
206	2810001G20Rik	-0.513766	-1.66279
207	2810004N23Rik	0.451994	0.997988
208	2810013P06Rik	-0.136517	1.04988
209	2810021J22Rik	-0.922691	0.468319
210	2810025M15Rik	-1.36425	-1.18511
211	2810029C07Rik	-2.36774	-3.51795
212	2810032G03Rik	-0.627718	-3.19768
213	2810403A07Rik	-0.216844	1.62962
214	2810408A11Rik	-3.89644	-5.92858
215	2810408I11Rik	-3.98902	-4.67672
216	2810410L24Rik	1.46218	4.93248
217	2810428I15Rik	2.81061	1.99623
218	2810474O19Rik	-0.549555	3.92908
219	2900011O08Rik	-2.84601	-3.92414
220	2900026A02Rik	1.14187	4.31789
221	2900092C05Rik	-3.57133	-6.54446
222	2900097C17Rik	-1.10648	-2.10145
223	3110040N11Rik	1.02733	1.54075
224	3110070M22Rik	-3.17783	-4.03027
225	3830406C13Rik	-2.63188	-0.785187
226	3830417A13Rik	-2.40628	-3.29139
227	4430402I18Rik	-4.68093	-5.3887
228	4632428N05Rik	2.12349	2.63731
229	4732491K20Rik	0.465628	3.60649
230	4833418N02Rik	-1.09929	-3.60159
231	4833420G17Rik	-1.17627	-0.141018
232	4833427G06Rik	-3.88127	-3.13767
233	4921501E09Rik	-2.79934	-6.43489
234	4921504E06Rik	-3.14769	-6.24446
235	4921507P07Rik	-5.40479	-9.60367
236	4921524L21Rik	-3.5568	-4.77575
237	4921525O09Rik	-2.69804	-2.51528
238	4921530L21Rik	-4.27137	-10.4323
239	4921531C22Rik	-2.26899	-3.58893
240	4921539E11Rik	-3.95116	-6.02278
241	4930402K13Rik	-1.59948	-5.1846
242	4930406D18Rik	-4.19391	-6.72514
243	4930407I10Rik	-4.49261	-10.3805
244	4930413G21Rik	-0.625592	-4.59237
245	4930415F15Rik	-3.91375	-6.54199
246	4930415O20Rik	-3.92733	-5.06537
247	4930423M02Rik	-1.85831	-4.57558
248	4930426D05Rik	1.87542	3.12236
249	4930427A07Rik	-1.21017	-1.93754
250	4930429F11Rik	-1.28224	-4.43457
251	4930429F24Rik	-2.63548	-2.83177
252	4930430A15Rik	-3.90636	-4.80025
253	4930430F08Rik	-2.54898	-0.742413
254	4930432K21Rik	-1.83035	-2.04804
255	4930433N12Rik	-2.56626	-5.83571
256	4930435E12Rik	-4.04256	-10.262
257	4930440C22Rik	-1.64842	-7.15822
258	4930442J19Rik	-3.46391	-3.4502
259	4930443O20Rik	-2.56539	-6.83611
260	4930444F02Rik	-3.19697	-3.12113
261	4930444G20Rik	-2.76926	-6.35691
262	4930444M15Rik	-1.82523	-4.99251
263	4930444P10Rik	-3.53943	-4.89216
264	4930447K03Rik	-1.43286	-6.49679
265	4930451G09Rik	-2.61101	-3.08149
266	4930451I11Rik	-3.84714	-6.44514
267	4930452B06Rik	-1.84647	-3.2508
268	4930452G13Rik	-3.43902	-4.13025
269	4930453H23Rik	-2.48249	-7.92088
270	4930453L07Rik	-2.28291	-7.02862
271	4930453N24Rik	-4.33883	-2.32266
272	4930455J16Rik	-2.44975	-4.98076
273	4930463O16Rik	-1.35472	-4.09126
274	4930465K10Rik	-3.2747	-4.74874
275	4930471G03Rik	-5.03134	-6.75068
276	4930471M09Rik	-1.59011	-4.27629
277	4930473O22Rik	-2.1542	-7.53855
278	4930474N09Rik	-2.97773	-7.14374
279	4930478P22Rik	-2.01945	-5.93318
280	4930480E11Rik	-1.57686	-5.42349
281	4930483J18Rik	-2.85785	-6.30074
282	4930500F04Rik	-2.18346	-5.1675
283	4930503B20Rik	-5.49781	-8.87038
284	4930503E14Rik	-2.73686	-4.69961
285	4930503L19Rik	-3.38283	-3.89828
286	4930504O13Rik	-4.03038	-2.7484
287	4930505A04Rik	-4.64308	-8.08584
288	4930507D10Rik	-2.52915	-6.74052
289	4930513N10Rik	-2.98284	-3.08616
290	4930515G01Rik	-1.4307	-4.68113
291	4930519F16Rik	-1.56359	-5.32668
292	4930519G04Rik	-2.42629	-7.56898
293	4930519H02Rik	-2.21021	-7.73339
294	4930522H14Rik	-4.38107	-6.92426
295	4930523C07Rik	-1.69396	-2.66836
296	4930523O13Rik	-2.78186	-7.74141
297	4930524B15Rik	-2.67782	-2.24116
298	4930524N10Rik	-3.0221	-5.46767
299	4930539E08Rik	-0.586007	-2.515
300	4930539J05Rik	-3.08425	-1.84785
301	4930548G14Rik	-1.41415	-7.6178
302	4930548H24Rik	-2.45253	-8.09551
303	4930549C01Rik	-4.34503	-10.0146
304	4930550C14Rik	-3.68772	-4.05236
305	4930556M19Rik	-1.30056	-2.45015
306	4930556N09Rik	-1.39823	-4.21596
307	4930557A04Rik	-4.02306	-9.41125
308	4930558J18Rik	-2.04803	-3.25456
309	4930562C15Rik	-3.31833	-6.22354
310	4930562F07Rik	-2.11819	-5.37686
311	4930563D23Rik	-4.78951	-9.26364
312	4930563E22Rik	-1.09086	-1.47896
313	4930568D16Rik	-2.12412	-7.93659
314	4930568G15Rik	-1.34282	-3.81097
315	4930571K23Rik	-5.49309	-7.59941
316	4930578I06Rik	-4.42607	-6.35193
317	4930579F01Rik	-3.38836	-5.78828
318	4930579G24Rik	-2.34405	-2.16884
319	4930584F24Rik	-3.93642	-6.70962
320	4930591A17Rik	-2.17399	-4.94756
321	4930593A02Rik	-0.810997	-4.98542
322	4931406C07Rik	-0.639946	1.30261
323	4931408D14Rik	-2.42596	-2.9062
324	4931417E11Rik	-4.19405	-4.42686
325	4931423N10Rik	-3.19416	-3.06872
326	4931428L18Rik	-2.26219	-4.16402
327	4932414N04Rik	-3.67829	-3.33987
328	4932416H05Rik	-2.54056	-4.126
329	4932438A13Rik	-2.79865	-1.88717
330	4933402C06Rik	-1.36134	-7.07175
331	4933402D24Rik	-1.78544	-5.29086
332	4933402J07Rik	-4.99033	-6.7375
333	4933404G15Rik	-3.58879	-7.54912
334	4933404O12Rik	-2.08135	-2.44808
335	4933405L10Rik	-3.31183	-5.63392
336	4933405O20Rik	-3.72909	-7.69065
337	4933406C10Rik	-1.98613	-3.12512
338	4933406F09Rik	-5.31344	-4.40442
339	4933406K04Rik	-2.57969	-6.89529
340	4933411G06Rik	-3.4022	-6.41604
341	4933411K16Rik	-5.7995	-6.72776
342	4933412E12Rik	-1.56522	-4.54644
343	4933412E24Rik	-2.07532	-3.96718
344	4933412O06Rik	-1.55292	-7.43516
345	4933415F23Rik	-4.77065	-3.60245
346	4933416C03Rik	-4.29054	-2.80122
347	4933417A18Rik	-4.3593	-7.23063
348	4933417E11Rik	-0.971958	-3.88159
349	4933421I07Rik	-2.48973	-5.09962
350	4933422A05Rik	-1.93796	-4.84475
351	4933424G06Rik	-3.27926	-6.28174
352	4933425L06Rik	-1.7792	-2.66524
353	4933427D14Rik	-1.95283	-0.871183
354	4933427G17Rik	-3.73615	-4.45029
355	4933430H16Rik	-1.58406	-3.08997
356	4933430I17Rik	-2.65297	-3.76108
357	4933432K03Rik	-4.72314	-4.15199
358	4933433C11Rik	-4.29285	-8.11618
359	4933433G15Rik	-3.366	-3.4182
360	4933434E20Rik	-1.26689	-2.18838
361	4933436I01Rik	-2.92441	-7.2759
362	4933438B17Rik	-1.29199	-4.89673
363	4933438K21Rik	-2.52246	-5.90164
364	4933440M02Rik	-3.07471	-4.66233
365	5031425E22Rik	0.360064	-1.76993
366	5031439G07Rik	-0.838921	0.891616
367	5330417C22Rik	-3.53972	-4.7114
368	5730403I07Rik	-2.26139	-4.72969
369	5730409E04Rik	1.60534	3.68621
370	5730455P16Rik	-0.678269	2.49797
371	5730508B09Rik	-1.83864	-2.08084
372	5730559C18Rik	-1.93578	-5.88073
373	6030498E09Rik	-0.408771	-2.37103
374	6330416G13Rik	1.1145	2.51117
375	6430531B16Rik	-2.46305	-2.17104
376	6720468P15Rik	-0.986673	-4.12
377	6820408C15Rik	-2.44754	-3.19383
378	8030462N17Rik	-0.470517	1.1469
379	8430426J06Rik	-2.77282	-4.94566
380	8430429K09Rik	-1.30765	-1.67661
381	9030617O03Rik	1.75312	3.67603
382	9030624J02Rik	0.932466	1.82143
383	9130011E15Rik	0.579986	2.11019
384	9130019O22Rik	0.725471	3.44637
385	9130401M01Rik	2.48331	2.13926
386	9230104L09Rik	-1.1939	2.82409
387	9230110C19Rik	-3.06938	-2.0947
388	9230114K14Rik	-0.462448	-1.83415
389	9330159M07Rik	-2.45204	-2.4483
390	9430015G10Rik	-0.998289	-1.04107
391	9430038I01Rik	1.5738	2.41797
392	9530068E07Rik	0.881041	1.46581
393	9530077C05Rik	-2.31816	-2.29945
394	9930012K11Rik	1.02315	1.00946
395	A230046K03Rik	-0.379109	1.85046
396	A230050P20Rik	2.29624	4.71448
397	A330023F24Rik	-0.5693	1.85261
398	A430005L14Rik	-0.43689	-0.66042
399	A430035B10Rik	-0.381068	-1.65126
400	A630095E13Rik	-0.999979	-6.69633
401	A730017C20Rik	-0.062381	-3.35096
402	A830010M20Rik	-1.63833	-1.97491
403	A830080D01Rik	-0.391082	3.15683
404	A930005H10Rik	1.09172	2.01878
405	A930006K02Rik	-1.7233	-3.4378
406	A930018P22Rik	-3.14365	-5.11502
407	A930024E05Rik	-1.78196	-2.19745
408	AA474331	0.467795	2.20393
409	Aaed1	-0.775815	0.402632
410	Aagab	0.929907	1.32639
411	Aak1	-1.48396	0.347827
412	Aars2	-0.618822	-3.39858
413	Aasdhppt	-1.80288	-0.496563
414	Aass	-0.363798	1.90044
415	Aatf	-1.48857	-1.65205
416	AB124611	1.13494	1.91485
417	Abat	0.198996	1.43588
418	Abca1	0.273358	4.01521
419	Abca14	-3.56379	-4.33333
420	Abca16	-3.53742	-4.36659
421	Abca2	1.64971	2.0695
422	Abca3	1.76592	2.54188
423	Abca4	0.791567	2.58495
424	Abca8a	-0.0301024	2.30354
425	Abca9	-1.52834	4.01049
426	Abcb1b	0.591321	0.996087
427	Abcb7	-0.4445	4.59236
428	Abcb8	0.692186	0.792916
429	Abcc1	0.721308	1.78039
430	Abcc12	-3.45555	-4.19208
431	Abcc4	0.537966	3.24093
432	Abcc5	1.34456	2.28749
433	Abcc9	-0.000957674	1.95906
434	Abcd3	-0.116738	2.03515
435	Abce1	-2.7352	1.07394
436	Abcf2	-1.1415	-1.34595
437	Abcg1	1.28196	3.85143
438	Abhd12	1.23152	1.26654
439	Abhd14b	2.26911	2.44979
440	Abhd17a	0.336186	-0.89596
441	Abhd17b	-2.94509	-1.21468
442	Abhd2	-2.3236	-3.97218
443	Abhd4	1.41194	0.654588
444	Abhd5	-2.77566	-4.35626
445	Abhd6	0.810188	1.56035
446	Abi2	-1.39007	0.732336
447	Abi3	-2.17888	2.17045
448	Ablim1	1.21782	2.52196
449	Abr	0.965736	1.39298
450	Abracl	0.902394	2.69147
451	Abt1	0.604873	1.35297
452	Abtb2	1.1682	1.75408
453	Acaa1a	3.32785	2.66446
454	Acaa2	4.00798	3.08294
455	Acaca	-0.620906	1.12686
456	Acacb	1.33138	2.76041
457	Acad10	1.20225	0.924742
458	Acad11	-0.929616	0.493792
459	Acad8	2.27793	3.79734
460	Acad9	0.669074	2.09491
461	Acadl	2.06643	2.78136
462	Acadm	1.03249	4.15406
463	Acads	3.37799	4.66824
464	Acadsb	-0.60257	2.34288
465	Acadvl	2.76036	2.27208
466	Acan	0.623794	6.09644
467	Acap1	-0.849423	-1.32489
468	Acat1	1.87196	2.76593
469	Acbd3	-1.80749	-3.82082
470	Acbd4	2.52205	3.5045
471	Acbd5	-1.65377	0.949958
472	Acbd6	-0.79847	-1.53045
473	Accs	1.22111	3.03578
474	Acd	0.134348	-0.970602
475	Acer3	-0.861708	0.908687
476	Ackr3	1.56745	2.84305
477	Acly	1.34893	1.15512
478	Aco1	2.31452	1.94636
479	Aco2	0.697641	0.908387
480	Acot1	5.14784	5.82927
481	Acot11	1.11873	2.68207
482	Acot13	1.62546	3.14831
483	Acot2	1.69052	3.49206
484	Acot6	0.605514	3.74192
485	Acot7	-1.91122	-1.86947
486	Acot9	-1.9198	-0.900062
487	Acox1	1.01158	1.97883
488	Acp1	-2.12564	-2.06308
489	Acp6	1.88247	2.32875
490	Acr	-4.40392	-4.97151
491	Acrbp	-3.69478	-3.65054
492	Acrv1	-4.80972	-6.05636
493	Acsbg1	3.41128	2.90215
494	Acsbg2	-4.75202	-7.51139
495	Acsf2	3.34688	2.8978
496	Acsf3	0.170522	-1.39942
497	Acsl1	-4.32835	-3.6669
498	Acsl3	-1.7378	-0.825771
499	Acsl4	-0.448756	2.51668
500	Acsl5	-0.725602	-0.647946
501	Acsl6	-3.19588	-3.35148
502	Acss2	-1.04454	-1.56965
503	Acta2	2.73509	1.86924
504	Actb	0.997087	-1.35788
505	Actg2	-2.49617	-4.50915
506	Actl6a	-0.966396	-0.7439
507	Actl7a	-4.78059	-7.02738
508	Actl7b	-4.48347	-5.06449
509	Actl9	-4.73179	-4.7845
510	Actn1	2.23871	1.16854
511	Actr10	-1.84451	0.752624
512	Actr1a	-0.583658	-4.4849
513	Actr1b	1.40926	0.883992
514	Actr2	-1.17235	1.96014
515	Actr3	0.651488	1.3869
516	Actr3b	1.91804	3.34301
517	Actr8	-0.717669	-0.502443
518	Actrt1	-3.32394	-7.33587
519	Actrt3	-3.94104	-10.2329
520	Acvr1	1.89505	3.08853
521	Acvr2a	-1.62054	-0.579132
522	Acvrl1	2.99668	4.17781
523	Acy1	2.73409	3.97826
524	Acy3	1.2664	1.8334
525	Acyp1	-2.66108	-1.55688
526	Ada	2.65857	1.57849
527	Adad1	-4.76153	-1.97114
528	Adad2	-1.83333	-2.27227
529	Adam10	-0.713999	1.19298
530	Adam15	1.69501	1.99472
531	Adam18	-4.2908	-3.36682
532	Adam1b	-3.66307	-3.58963
533	Adam2	-4.709	-2.6846
534	Adam21	-3.1658	-8.43039
535	Adam22	-1.65442	-1.40065
536	Adam23	1.8949	3.88767
537	Adam24	-4.0461	-7.23995
538	Adam25	-3.07485	-7.44996
539	Adam26a	-3.01765	-7.97163
540	Adam3	-5.99167	-3.58571
541	Adam32	-5.45967	-2.96549
542	Adam33	1.42988	2.68722
543	Adam6a	-3.97103	-9.12374
544	Adam6b	-3.70554	-9.06809
545	Adam8	2.0622	4.21488
546	Adam9	-1.00222	2.31153
547	Adamts1	0.608805	4.96574
548	Adamts10	2.39915	3.17883
549	Adamts15	1.0714	4.93696
550	Adamts2	2.46295	2.5004
551	Adamts20	-0.896614	-0.915593
552	Adamts5	0.280465	3.58738
553	Adamts7	0.906087	0.656282
554	Adamts9	0.182783	3.83261
555	Adamtsl1	0.0786267	-2.14075
556	Adamtsl2	1.24194	2.44538
557	Adamtsl4	1.38546	1.9279
558	Adap2	0.206501	3.50818
559	Adar	1.32798	1.93363
560	Adarb1	-0.790243	-2.14695
561	Adat2	-1.89411	-3.26342
562	Adck1	1.38909	1.13789
563	Adck2	1.4128	1.61062
564	Adck3	2.89108	2.09037
565	Adck4	0.632403	0.957077
566	Adck5	2.88269	2.71482
567	Adcy10	-4.67706	-5.07081
568	Adcy3	1.01335	1.46565
569	Adcy4	1.43004	2.88176
570	Adcy5	1.26691	2.87623
571	Adcy6	1.45257	4.50278
572	Adcy7	0.714794	1.9518
573	Adcy9	1.10088	3.54854
574	Add1	2.13257	2.21847
575	Add3	-1.2956	-0.492144
576	Adgb	-3.04181	-4.96868
577	Adh1	2.80314	3.99848
578	Adh5	2.18952	1.93975
579	Adhfe1	1.10316	4.33704
580	Adig	-3.05361	-5.98241
581	Adipoq	-1.80491	-2.53507
582	Adipor1	1.38773	1.63546
583	Adipor2	1.76418	3.96584
584	Adk	0.715131	-0.103064
585	Adm	1.16665	5.07317
586	Ado	-0.417012	0.923381
587	Adora1	0.837034	1.60147
588	Adpgk	1.57751	1.36277
589	Adprhl2	2.86508	2.44739
590	Adrbk1	1.98758	2.39547
591	Adrbk2	-2.22288	-2.63909
592	Adss	-2.67746	-0.882104
593	Adtrp	-2.1824	-7.6083
594	Aebp1	3.45936	4.76725
595	Aebp2	-0.956096	0.909027
596	Aen	1.48228	1.38615
597	Aes	3.25407	3.19941
598	AF251705	2.46205	5.34007
599	AF366264	-3.8489	-4.21426
600	Afap1	-1.08598	0.718068
601	Afap1l2	1.50261	3.74092
602	Aff1	0.878749	3.15829
603	Aff3	0.147059	1.79836
604	Aff4	-1.75712	1.01134
605	Afg3l1	0.0690911	0.0283835
606	Afg3l2	-0.193147	1.13529
607	Afmid	0.974086	1.33566
608	Aftph	-2.70541	-1.50995
609	Aga	1.35141	2.863
610	Agap1	-0.0883302	-3.49
611	Agap3	1.84401	1.94633
612	Agbl3	-1.17529	-1.98337
613	Agbl4	-3.37355	-5.59117
614	Agbl5	-3.18267	-2.23505
615	Ager	0.462377	4.16172
616	Agfg1	-3.02544	-0.894044
617	Agl	-0.488004	1.82158
618	Agmo	-0.0803149	2.16976
619	Ago1	0.802654	2.21199
620	Ago2	-0.389435	0.572655
621	Ago4	-1.70027	-1.93409
622	Agpat2	-0.994482	-3.01093
623	Agpat4	1.97156	2.58047
624	Agpat9	-2.26014	-2.19752
625	Agps	-0.567509	1.84547
626	Agrn	1.67941	2.47015
627	Agt	1.68298	3.64207
628	Agtpbp1	-3.96628	-4.14813
629	Agtr1a	-1.81879	-2.09209
630	Agtr1b	-0.363655	-4.16422
631	Agtrap	0.973597	1.76628
632	Ahctf1	-3.71833	-1.65857
633	Ahcy	1.87728	2.20069
634	Ahcyl1	-0.126344	0.200654
635	Ahcyl2	-1.92324	-1.55255
636	Ahdc1	-0.847178	-2.47421
637	Ahi1	-3.41208	-1.22549
638	Ahnak	2.10124	2.6515
639	Ahr	0.126516	5.90473
640	Ahsa1	0.992555	1.21232
641	Ahsa2	-1.82687	1.03373
642	Ahsg	2.9074	5.98851
643	AI314180	-1.79471	1.66111
644	AI413582	1.5465	1.68782
645	AI429214	-2.43248	-2.22608
646	AI464131	-0.895929	-2.63459
647	AI467606	0.650134	-1.37069
648	AI507597	-4.50046	-8.09229
649	AI597479	-1.34132	-1.77048
650	AI607873	0.0657603	3.93776
651	AI662270	0.342288	2.70205
652	AI846148	-0.181674	0.756691
653	AI854517	-1.41531	-3.42607
654	AI987944	-2.64049	-1.69552
655	Aif1	-3.57315	-3.4466
656	Aif1l	2.38643	1.77398
657	Aifm1	0.763669	3.22499
658	Aifm2	1.43534	1.51379
659	Aifm3	1.92016	2.00316
660	Aig1	1.42277	1.42219
661	Aim1l	0.826997	1.85145
662	Aip	2.06678	2.06636
663	Airn	0.84014	2.24489
664	Ak2	-0.631408	-2.52733
665	Ak3	0.925105	2.47693
666	Ak7	-3.23962	-2.15884
667	Ak8	-3.73926	-4.17446
668	Akap1	-2.77036	-6.08174
669	Akap10	-2.33472	-8.68291
670	Akap11	-1.76753	1.44449
671	Akap12	-4.95505	-1.54501
672	Akap14	-2.64871	-5.06057
673	Akap2	-0.689867	2.38862
674	Akap3	-4.91594	-5.35387
675	Akap4	-6.0017	-6.39719
676	Akap7	-0.94756	2.02602
677	Akap9	-1.14201	0.61317
678	Akirin1	-1.57588	0.731385
679	Akna	-2.04266	-2.10091
680	Aknad1	-2.53638	-6.99832
681	Akr1a1	2.91598	1.62202
682	Akr1b10	2.42065	3.98991
683	Akr1b7	1.71071	3.13232
684	Akr1b8	1.59535	2.42792
685	Akr1c12	0.465702	1.20987
686	Akr1c13	1.76914	2.85041
687	Akr1c14	0.863034	5.77802
688	Akr1cl	3.34048	3.05007
689	Akt1	2.73578	2.725
690	Akt2	1.48256	1.31426
691	Akt3	-1.76627	-2.91283
692	Alad	2.88798	3.07184
693	Alas1	1.09978	1.96452
694	Alcam	0.0121218	1.73776
695	Aldh16a1	2.14313	2.16139
696	Aldh18a1	2.45945	1.97662
697	Aldh1a1	1.04458	1.2996
698	Aldh1a3	1.08086	3.49822
699	Aldh1a7	0.606885	2.79287
700	Aldh1b1	2.19491	1.88615
701	Aldh1l1	2.42742	-3.25418
702	Aldh2	3.1384	2.03282
703	Aldh3a1	0.0217259	2.51964
704	Aldh3a2	0.31226	1.66512
705	Aldh3b2	-2.73391	-6.40727
706	Aldh4a1	2.44287	2.87565
707	Aldh5a1	0.861905	2.82521
708	Aldh6a1	-0.546904	1.6877
709	Aldh7a1	2.0123	1.34327
710	Aldh9a1	1.01392	0.588648
711	Aldoa	1.63445	0.594213
712	Aldoart1	-4.48635	-7.17697
713	Aldoart2	-4.9871	-6.71914
714	Aldoc	2.68085	3.03866
715	Alg1	2.14944	2.1666
716	Alg10b	-0.71366	2.02411
717	Alg11	-1.29304	-0.612426
718	Alg12	-0.238231	-1.3322
719	Alg13	-2.03083	2.47489
720	Alg14	0.687865	2.19139
721	Alg2	1.57545	2.07509
722	Alg3	0.609807	1.04531
723	Alg5	2.10321	2.53299
724	Alg9	-0.526524	-0.999598
725	Alkbh2	2.36568	3.98364
726	Alkbh3	-0.925641	-0.835934
727	Alkbh6	1.94938	2.56854
728	Alkbh8	-0.937352	-1.62311
729	Allc	-4.87085	-5.82443
730	Alms1	-3.24509	-1.14428
731	Alox5	1.15034	1.739
732	Alox5ap	3.34034	4.41665
733	Alpk3	0.405468	-0.718524
734	Als2cl	1.72796	2.74959
735	Als2cr11	-4.85794	-2.59399
736	Als2cr12	-3.96433	-3.05052
737	Alx1	-3.27864	-3.06157
738	Alyref	0.619683	-0.945006
739	Amacr	2.04998	2.98073
740	Amdhd2	0.24175	-0.934325
741	Amhr2	1.71123	1.29959
742	Amigo1	0.752779	1.36828
743	Ammecr1l	-1.78557	-1.83082
744	Amn1	-3.72323	-1.65788
745	Amot	-0.755787	1.05113
746	Amotl1	-1.74704	-1.76773
747	Amotl2	2.3521	2.0508
748	Ampd2	2.13018	2.67976
749	Ampd3	1.28188	6.35335
750	Amy1	-1.02395	2.93055
751	Amz2	-2.30274	-0.515432
752	Anapc1	-0.307652	1.37147
753	Anapc10	-1.55091	-1.91541
754	Anapc11	0.214086	-1.68612
755	Anapc2	1.54075	1.122
756	Anapc4	-1.01932	1.40276
757	Anapc5	0.986388	1.20982
758	Anapc7	2.04479	2.25636
759	Angel1	-2.60911	-2.31931
760	Angel2	-0.673213	0.986333
761	Angptl2	1.28772	5.50632
762	Angptl4	3.73285	4.17961
763	Angptl6	1.88878	2.70986
764	Ank	-0.0781777	2.06608
765	Ank2	-2.97355	-2.27681
766	Ankef1	-5.23733	-6.00158
767	Ankfy1	-0.290496	2.08538
768	Ankhd1	-2.01194	0.769363
769	Ankib1	-1.64407	1.36671
770	Ankle2	-1.45164	0.55733
771	Ankmy2	1.51558	3.8184
772	Ankra2	-0.717714	-1.57434
773	Ankrd11	-0.49469	1.48905
774	Ankrd12	-1.4371	1.08833
775	Ankrd13c	-1.37166	0.0514698
776	Ankrd16	0.563818	2.11356
777	Ankrd17	-1.54321	1.46866
778	Ankrd22	-0.45867	-4.68584
779	Ankrd24	0.779713	2.70723
780	Ankrd28	-2.03547	1.55911
781	Ankrd35	1.41146	4.06954
782	Ankrd36	-4.09161	-4.87468
783	Ankrd40	0.0449372	-0.292261
784	Ankrd42	-4.16599	-3.15959
785	Ankrd44	-0.954133	1.27014
786	Ankrd45	-3.02848	-7.26793
787	Ankrd46	1.31428	2.48962
788	Ankrd49	-3.11043	-1.37927
789	Ankrd50	0.745362	2.03281
790	Ankrd54	-1.43193	-1.476
791	Ankrd66	0.158413	-3.10208
792	Ankrd7	-4.49662	-5.2402
793	Anks1b	-0.627594	-3.64331
794	Anks3	1.19869	2.19007
795	Ano1	-0.0749698	-0.794787
796	Ano4	0.240814	2.24189
797	Ano6	1.28989	4.02065
798	Anp32a	1.71232	2.83378
799	Anpep	2.66821	3.41615
800	Antxr1	0.858639	4.2329
801	Anxa1	1.1629	4.14425
802	Anxa2	2.84248	2.03598
803	Anxa3	0.80012	4.05976
804	Anxa4	1.75226	1.83372
805	Anxa5	3.05619	4.70867
806	Anxa6	3.44568	3.18646
807	Anxa7	1.43118	1.90413
808	Aoah	0.601949	4.19074
809	Aoc3	2.46248	3.13721
810	Aox1	0.752253	2.98929
811	Aox3	-2.0395	-1.91189
812	Aox4	-0.437542	-1.92106
813	Ap1ar	-0.587306	1.19398
814	Ap1g1	-1.8114	1.0262
815	Ap1g2	2.14581	1.65004
816	Ap1m1	-1.04326	-0.789396
817	Ap1s1	1.88251	1.91244
818	Ap1s2	-0.594485	3.5253
819	Ap2a1	-0.984365	-1.96591
820	Ap2b1	-2.3011	-3.37079
821	Ap2m1	2.01016	1.73522
822	Ap3m1	-1.58424	1.68103
823	Ap3s1	-1.63067	-2.4815
824	Ap3s2	1.04309	2.20597
825	Ap4e1	-1.39779	0.494982
826	Ap5b1	-0.852124	-2.55503
827	Ap5s1	2.05308	2.43076
828	Ap5z1	1.03865	1.11565
829	Apba1	-2.79441	-3.09684
830	Apbb2	0.585234	3.08139
831	Apc	-0.77469	2.28639
832	Apcdd1	0.414786	2.80031
833	Apeh	2.41225	2.2611
834	Apex1	1.35267	1.42098
835	Aph1a	2.78949	2.84597
836	Aplnr	1.33087	2.96203
837	Aplp2	0.311437	1.7341
838	Apmap	0.940167	2.73097
839	Apoa1	2.12707	2.41057
840	Apoa1bp	1.76221	0.81037
841	Apobec1	1.13438	6.13857
842	Apobec3	1.77873	3.03393
843	Apobec4	-3.88345	-6.88311
844	Apobr	0.831111	3.9413
845	Apoc1	2.14454	4.15239
846	Apod	1.4051	3.33261
847	Apoe	3.70685	4.83372
848	Apoh	-3.93379	-8.64924
849	Apol6	2.61277	6.91262
850	App	1.12673	-0.267154
851	Appbp2	-1.52771	2.61933
852	Appl2	0.880068	1.4676
853	Aptx	-2.31372	-3.02965
854	Aqp1	2.73187	1.52877
855	Aqp11	-4.478	-4.02383
856	Aqp2	3.8514	1.57008
857	Aqp5	4.10502	6.78342
858	Aqp7	-4.02563	-7.96538
859	Aqp9	-3.37022	-4.31356
860	Ar	-0.268326	3.85276
861	Araf	1.61266	3.22395
862	Arap1	2.93915	2.6456
863	Arap2	-1.19782	1.26786
864	Arap3	1.28539	3.20471
865	Arc	-3.56733	-3.44279
866	Arcn1	-1.05709	1.32127
867	Arel1	-2.37877	-7.80957
868	Arf1	1.00066	-0.727852
869	Arf2	-0.0801102	1.5356
870	Arf3	0.438859	1.25868
871	Arf4	-0.522816	-1.56233
872	Arf6	0.789321	1.95036
873	Arfgap1	1.13294	1.81203
874	Arfgap3	-0.983689	-1.79501
875	Arfgef2	-1.91646	-0.543599
876	Arfip1	-0.100194	1.52649
877	Arfip2	2.32049	2.89239
878	Arhgap1	1.97127	3.0761
879	Arhgap10	0.92107	1.81206
880	Arhgap12	-1.68249	2.96839
881	Arhgap15	0.222356	0.315804
882	Arhgap17	1.05832	2.5645
883	Arhgap18	-0.440344	2.62966
884	Arhgap19	-2.12992	-1.24806
885	Arhgap20	-1.9551	-2.67817
886	Arhgap21	0.301026	3.42997
887	Arhgap24	0.330732	3.69331
888	Arhgap26	-0.36391	-2.32047
889	Arhgap29	-3.68268	-1.03114
890	Arhgap30	-1.45208	-1.82646
891	Arhgap31	0.448975	1.57853
892	Arhgap33	-2.11825	-1.49229
893	Arhgap39	-0.708092	-0.732427
894	Arhgap4	1.29694	2.4039
895	Arhgap42	-0.105091	4.31094
896	Arhgap5	-2.71932	1.25245
897	Arhgap8	0.0403741	-0.889782
898	Arhgap9	2.44171	2.48151
899	Arhgdia	2.13389	1.86215
900	Arhgdib	2.84729	6.08935
901	Arhgdig	3.38976	3.30627
902	Arhgef1	2.22773	2.79052
903	Arhgef10l	0.189765	-0.531417
904	Arhgef15	0.167345	-1.57412
905	Arhgef17	2.12906	5.62964
906	Arhgef18	1.80742	1.4093
907	Arhgef2	-2.24841	-6.53339
908	Arhgef25	0.624161	1.22464
909	Arhgef28	0.147584	3.44907
910	Arhgef3	0.322784	1.61164
911	Arhgef33	-1.59821	-3.02965
912	Arhgef4	1.38847	2.73973
913	Arhgef40	2.03898	2.53833
914	Arhgef5	1.00498	5.07405
915	Arhgef6	-1.97699	4.85866
916	Arhgef7	-0.242823	0.679926
917	Arid1a	0.159678	1.36152
918	Arid1b	0.780723	1.29086
919	Arid2	-3.16045	-1.48615
920	Arid3b	-2.00759	-2.59808
921	Arid5b	-0.664273	1.73463
922	Arih1	-3.12348	-0.71232
923	Arih2	-1.58703	-2.32273
924	Arl1	-1.72857	0.40768
925	Arl13a	-2.87463	-7.4261
926	Arl14ep	-1.83515	-0.386463
927	Arl2bp	-2.0276	-3.11151
928	Arl4a	-3.45181	-2.23439
929	Arl4c	0.573462	3.43522
930	Arl5a	0.0858146	2.70941
931	Arl5b	-1.89227	-0.476246
932	Arl6	-2.22823	-1.84103
933	Arl6ip1	-0.913069	-1.20379
934	Arl6ip4	0.819556	0.58756
935	Arl6ip5	2.85105	4.00907
936	Arl6ip6	-2.56664	-1.20009
937	Arl8a	1.86021	1.24666
938	Arl8b	-1.60664	-1.69678
939	Armc10	0.570869	2.8679
940	Armc12	-4.48656	-6.21634
941	Armc3	-4.06439	-5.08487
942	Armc4	-3.19604	-5.34032
943	Armc8	-1.56581	1.27211
944	Armc9	-1.90246	-2.22369
945	Armcx1	0.625894	5.73508
946	Armcx2	2.10961	4.48283
947	Armcx3	0.715225	4.96545
948	Armcx6	2.82734	5.81934
949	Arnt2	0.867078	5.31525
950	Arntl	-0.0680299	0.663303
951	Arpc1b	2.93093	4.28852
952	Arpc2	-0.434125	0.502345
953	Arpc3	2.30199	2.49507
954	Arpc4	2.56549	1.63959
955	Arpc5	0.930436	2.32581
956	Arrb1	1.05172	1.90472
957	Arrb2	2.28302	3.10164
958	Arrdc1	2.66837	2.9092
959	Arrdc2	1.0112	0.894144
960	Arrdc3	-2.57381	-0.746881
961	Arrdc4	0.80721	2.51528
962	Arrdc5	-4.20881	-7.26738
963	Arsa	-1.98711	-3.0153
964	Arsb	1.2452	2.92519
965	Arsg	1.27181	4.03896
966	Arsi	0.77746	1.68571
967	Arsk	-0.134206	1.11705
968	Art1	-1.72319	-6.05313
969	Art3	-2.72119	-0.626766
970	Art4	2.21873	3.95675
971	Art5	-3.32516	-3.69462
972	Artn	-1.40438	-4.68668
973	Arx	2.21133	3.22665
974	Asah1	0.871771	3.3963
975	Asap1	-2.62811	-1.93551
976	Asb1	-1.8717	-3.72436
977	Asb12	-2.06793	-5.4316
978	Asb13	0.989694	5.88332
979	Asb17	-5.21902	-6.58288
980	Asb4	-3.03848	-6.68722
981	Asb6	1.83318	1.09957
982	Asb8	-2.08135	-2.88511
983	Asb9	-3.69221	-5.83109
984	Ascc1	0.091428	-1.11313
985	Ascc2	-1.28343	-1.46808
986	Asgr1	3.74445	5.83136
987	Asgr2	1.44388	1.8675
988	Ash1l	-1.24854	0.309613
989	Ash2l	-1.83183	-1.43189
990	Asl	2.96445	2.43888
991	Asns	-1.52207	-1.48227
992	Asnsd1	-3.58798	-1.42787
993	Aspa	-1.10469	-1.75583
994	Asph	0.262321	3.75107
995	Aspm	-1.03126	-0.802573
996	Aspscr1	-0.721983	-2.38775
997	Asrgl1	-3.57125	-1.7427
998	Aste1	-2.91046	-3.51762
999	Asun	-2.85733	-0.630256
1000	Asxl1	-1.56324	-0.511128
1001	Asxl2	-1.69427	-1.14722
1002	Asz1	-2.42766	-1.07361
1003	Atad1	-2.70124	1.20916
1004	Atad2b	-0.926372	1.19705
1005	Atad3a	2.08218	2.05722
1006	Atat1	-0.16128	0.700492
1007	Ate1	-2.12381	-0.440938
1008	Atf2	-2.58869	-0.622869
1009	Atf3	2.08451	4.0578
1010	Atf4	1.51733	0.935368
1011	Atf6	-0.542944	1.37779
1012	Atf6b	1.28104	0.730929
1013	Atf7ip	-1.23878	0.59196
1014	Atf7ip2	-3.16082	-2.40558
1015	Atg101	2.41208	3.72258
1016	Atg12	-1.15463	-0.85553
1017	Atg13	0.175354	0.868828
1018	Atg14	0.43257	0.648638
1019	Atg16l1	1.59757	1.52191
1020	Atg4b	0.86367	1.06429
1021	Atg5	0.574546	2.07054
1022	Atg9a	-2.08605	-2.02753
1023	Athl1	2.7411	6.39809
1024	Atic	2.15084	2.79412
1025	Atl1	-2.76233	-6.14282
1026	Atl2	-1.81454	-2.4858
1027	Atl3	-3.47386	-1.17053
1028	Atm	-0.6697	1.3925
1029	Atmin	-1.44777	-1.4096
1030	Atn1	1.84965	2.84353
1031	Atoh8	-3.0615	-4.61231
1032	Atox1	2.04175	-0.419186
1033	Atp10a	-2.226	-2.63852
1034	Atp10d	-0.732282	1.7273
1035	Atp11a	-0.662042	0.215741
1036	Atp11c	-0.933097	0.0955078
1037	Atp13a1	1.4725	1.65687
1038	Atp13a2	2.04855	2.0354
1039	Atp13a3	-1.66072	0.0133054
1040	Atp1a1	2.86831	2.62229
1041	Atp1a4	-5.05628	-6.58562
1042	Atp1b1	0.315081	1.55103
1043	Atp1b2	2.07979	2.96715
1044	Atp2a2	-0.736779	1.59505
1045	Atp2b1	-0.603852	3.34968
1046	Atp2c1	-1.42501	-0.64471
1047	Atp5a1	1.51524	0.710589
1048	Atp5b	1.15229	0.447887
1049	Atp5c1	1.58037	1.57967
1050	Atp5g1	1.54285	1.56532
1051	Atp5g2	2.99872	2.2873
1052	Atp5g3	2.85504	1.0919
1053	Atp5h	1.23252	0.433927
1054	Atp5j	0.0827833	0.50807
1055	Atp5j2	1.82933	0.648407
1056	Atp5k	1.0239	0.517328
1057	Atp5l	1.49169	1.40229
1058	Atp5o	1.03272	0.42932
1059	Atp6ap1	2.55716	2.69746
1060	Atp6v0a1	1.86694	0.482191
1061	Atp6v0a2	0.470654	1.47491
1062	Atp6v0b	1.70682	0.744305
1063	Atp6v0c	1.31536	1.00234
1064	Atp6v0d1	1.83578	1.39446
1065	Atp6v0e	2.08563	1.86293
1066	Atp6v0e2	1.43606	2.25589
1067	Atp6v1a	-2.10483	-2.05745
1068	Atp6v1b2	0.976393	2.46652
1069	Atp6v1c1	-1.82884	0.257744
1070	Atp6v1e1	1.60948	2.3889
1071	Atp6v1e2	-4.2263	-7.2822
1072	Atp7a	-0.510326	3.11591
1073	Atp7b	-0.982463	-3.56548
1074	Atp8a1	-0.298584	2.66963
1075	Atp8a2	-2.53205	-5.30245
1076	Atp8b2	0.815543	1.73068
1077	Atp8b3	-4.81521	-3.82303
1078	Atp9a	0.382519	-1.13912
1079	Atpaf2	-0.579995	-2.19685
1080	Atpif1	0.729759	1.93397
1081	Atrip	0.748516	1.04084
1082	Atrn	-0.65493	1.5524
1083	Atrnl1	-0.684393	1.19176
1084	Atrx	-0.13056	3.5289
1085	Atxn1	-0.300884	1.22123
1086	Atxn10	-0.429127	0.860135
1087	Atxn1l	-2.11884	-1.62551
1088	Atxn2	-0.754094	-0.807249
1089	Atxn2l	-2.18243	-1.57158
1090	Atxn3	-4.61756	0.779365
1091	Atxn7	-1.4149	0.583392
1092	Atxn7l1	-1.03413	-3.6197
1093	Atxn7l3b	-2.23428	-1.75641
1094	AU015836	-0.324719	1.2436
1095	AU021092	4.61152	3.89673
1096	AU022252	-0.190271	-1.27786
1097	Auh	1.40635	2.92081
1098	Aup1	0.565367	0.461517
1099	Aurka	-2.08084	-1.6221
1100	Aurkc	-2.31272	-4.23665
1101	Auts2	0.421325	0.923046
1102	AV039307	-2.85436	-4.10105
1103	Aven	-2.16138	-4.8262
1104	Avl9	-0.929361	1.44741
1105	Avpi1	2.4546	2.11003
1106	Avpr1a	0.998692	4.95865
1107	AW112010	1.01342	5.17157
1108	AW209491	-0.605514	1.0629
1109	AW549877	-1.28693	2.24236
1110	Axin2	1.02835	3.27411
1111	Axl	2.12928	3.09753
1112	Azi2	-2.17269	0.565418
1113	Azin1	-1.76925	-0.172386
1114	B230118H07Rik	-2.89465	-1.29874
1115	B230217C12Rik	0.555887	3.27904
1116	B230217O12Rik	0.497215	1.31729
1117	B230219D22Rik	-0.618895	1.85951
1118	B2m	1.58598	3.3228
1119	B330016D10Rik	-0.894576	1.50172
1120	B3galnt2	-1.04011	1.0627
1121	B3gat3	2.17709	2.99316
1122	B3glct	0.703163	2.23477
1123	B3gnt2	1.1539	4.6615
1124	B3gnt8	1.75659	1.21682
1125	B3gnt9	1.40542	1.60349
1126	B430306N03Rik	-0.797582	-2.8175
1127	B4galt1	1.73636	2.2615
1128	B4galt3	1.16425	1.6816
1129	B4galt4	1.90734	2.9606
1130	B4galt6	0.232247	2.98028
1131	B630005N14Rik	-1.05529	1.40709
1132	B630019K06Rik	0.586669	1.84728
1133	B930041F14Rik	3.49268	4.9421
1134	B9d1	-1.16395	-1.30964
1135	B9d2	1.47301	1.42636
1136	Bace1	0.699293	2.64563
1137	Bace2	2.04961	4.07356
1138	Bad	0.767878	0.575237
1139	Bag4	-1.3708	-1.50784
1140	Bag5	-3.77025	-3.15682
1141	Bahd1	1.45541	1.08328
1142	Baiap2	-1.19872	-2.16185
1143	Bak1	1.52499	1.24963
1144	Banf1	1.04499	0.818994
1145	Banf2	-4.45901	-8.80815
1146	Banp	0.844756	1.04846
1147	Bax	2.97206	3.49335
1148	Baz1a	-3.44495	-2.32278
1149	Baz2a	-1.77448	-1.56313
1150	Baz2b	-2.07177	2.8144
1151	BB557941	0.404143	-5.78428
1152	Bbip1	-2.42631	-1.09551
1153	Bbs1	-1.34202	-2.25861
1154	Bbs10	-2.23861	-1.33131
1155	Bbs5	-3.75439	-5.35505
1156	Bbs7	-3.15432	-2.06682
1157	Bbs9	-1.98254	-2.40058
1158	Bbx	-3.4174	-1.96752
1159	BC003965	0.86039	1.21028
1160	BC004004	1.66794	1.0131
1161	BC017158	1.12185	2.56202
1162	BC017643	1.21456	2.12119
1163	BC021891	1.05191	3.20193
1164	BC022687	-1.63684	-1.75796
1165	BC023829	0.78812	1.38792
1166	BC026585	2.84077	4.05497
1167	BC027072	-0.751102	-2.99322
1168	BC029214	1.2013	0.805568
1169	BC030336	-0.974905	-1.28463
1170	BC030499	-1.29785	-3.34944
1171	BC030867	-1.684	-2.99918
1172	BC031181	1.03726	0.863465
1173	BC037704	-1.62039	-3.08949
1174	BC048507	-3.62465	-7.49145
1175	BC048562	-3.94188	-8.9385
1176	BC048671	-4.62969	-6.4821
1177	BC049762	-4.09846	-4.67855
1178	BC051142	-4.84899	-2.43449
1179	BC051628	-3.93194	-7.19574
1180	BC052688	-0.991687	-2.26316
1181	BC055324	-0.846985	1.03167
1182	BC089491	-4.365	-7.20858
1183	BC100451	-4.67999	-7.03892
1184	Bcan	2.92456	6.59118
1185	Bcap29	-3.77135	-1.406
1186	Bcap31	2.25285	1.65936
1187	Bcar3	1.51493	2.37126
1188	Bcas1	-1.42872	-5.3172
1189	Bcas2	-0.798565	-2.72595
1190	Bcat2	2.98144	2.24635
1191	Bckdha	1.62093	1.40927
1192	Bckdhb	1.82814	4.90776
1193	Bckdk	2.999	3.40059
1194	Bcl10	1.44372	1.97714
1195	Bcl11a	-0.963452	-4.10138
1196	Bcl2	0.147327	2.84026
1197	Bcl2l14	-5.12888	-6.90708
1198	Bcl2l2	0.771928	2.3824
1199	Bcl3	2.60534	3.04997
1200	Bcl6	0.789992	2.14843
1201	Bcl6b	0.0960176	0.998004
1202	Bcl7c	0.371989	-1.5053
1203	Bcl9	0.591662	2.24961
1204	Bclaf1	-2.01771	1.02162
1205	Bcorl1	-0.189468	-2.26065
1206	Bcr	0.921228	3.74149
1207	Bcs1l	1.57714	2.16823
1208	Bdh1	0.0849613	-2.45596
1209	Bdh2	0.914212	3.05841
1210	Bdp1	-0.759225	0.678862
1211	Bean1	-0.231027	-3.70676
1212	Bend3	-0.660181	0.902992
1213	Best1	-4.00115	-4.59353
1214	Bet1	-1.16808	-0.101162
1215	Bet1l	1.396	0.613828
1216	Bex1	1.75879	1.99423
1217	Bex2	1.6409	3.17006
1218	Bex4	0.963729	1.76001
1219	Bex6	-0.574836	-3.25262
1220	Bfsp1	0.54632	-3.82878
1221	Bgn	2.8352	2.0959
1222	Bhlhe40	2.08978	3.34031
1223	Bhmt	0.0256057	1.5095
1224	Bhmt2	-0.666599	-3.53013
1225	Bicc1	0.489674	2.08522
1226	Bicd2	-1.62122	-6.79411
1227	Bid	1.11444	2.02236
1228	Bin1	3.44115	3.93175
1229	Birc2	-2.21743	0.610004
1230	Birc3	1.04776	3.88745
1231	Birc5	-1.3827	-0.746544
1232	Birc6	-1.14726	1.9106
1233	Blcap	1.25796	1.10809
1234	Blm	-2.09816	-0.839785
1235	Blmh	1.33563	2.01198
1236	Bloc1s2	-0.0599316	0.621233
1237	Bloc1s5	0.649971	1.16085
1238	Bloc1s6	0.161834	-7.83808
1239	Blvra	1.6011	2.37475
1240	Blvrb	3.5684	5.4188
1241	Blzf1	-2.29719	-2.55541
1242	Bmp1	2.95891	4.43926
1243	Bmp2k	-0.933878	1.44576
1244	Bmp4	0.742489	3.0974
1245	Bmp6	0.819891	2.46355
1246	Bmper	0.573072	3.95018
1247	Bmpr1a	-0.940137	1.87199
1248	Bmpr2	-0.14373	1.96782
1249	Bms1	-2.79717	-0.481213
1250	Bmyc	2.84342	4.29489
1251	Bnip2	-0.617724	1.34971
1252	Bnip3	0.425318	1.91434
1253	Boc	1.65025	0.639654
1254	Bok	3.70775	5.73636
1255	Bola2	1.68534	1.05597
1256	Boll	-3.92523	-3.31136
1257	Bora	-2.21493	-1.28685
1258	Bpgm	-1.48045	-2.78123
1259	Bphl	1.93409	1.60429
1260	Bpifb2	-1.59514	-4.66316
1261	Bpifb5	3.76069	2.57099
1262	Bpnt1	0.250242	-1.31658
1263	Braf	-2.09201	-6.26017
1264	Brap	-1.97912	-3.02051
1265	Brca1	-1.36793	-2.06865
1266	Brcc3	1.20331	2.98606
1267	Brd3	-1.27619	-2.53619
1268	Brd4	0.840973	1.23762
1269	Brd7	-1.23052	0.595092
1270	Brd8	-1.50199	1.24135
1271	Brdt	-4.51158	-2.64292
1272	Brf2	-0.193753	-1.40726
1273	Bri3bp	0.268031	-2.32317
1274	Brix1	-1.34285	1.06559
1275	Brk1	1.55886	1.09107
1276	Brms1	-0.904457	-1.41264
1277	Brms1l	-0.475782	1.78986
1278	Brox	-0.352685	1.70485
1279	Brsk1	-1.60983	-2.65476
1280	Brsk2	-1.62314	-2.41185
1281	Brwd1	-0.877979	1.50431
1282	Bscl2	-1.13273	-0.961865
1283	Bspry	-2.86349	-3.73809
1284	Bst2	4.1414	4.4505
1285	Btaf1	-2.92705	-0.739276
1286	Btbd1	-2.47925	-3.22021
1287	Btbd11	0.62528	2.43293
1288	Btbd19	0.838523	3.19387
1289	Btbd2	1.66385	1.79565
1290	Btbd3	0.233342	2.3137
1291	Btbd6	1.37123	1.88801
1292	Btbd9	-0.716887	-1.77705
1293	Btd	3.12704	4.59035
1294	Btf3	-0.611323	-0.422412
1295	Btf3l4	-1.62293	0.951455
1296	Btg1	-1.34967	-0.566512
1297	Btg2	1.79906	2.47612
1298	Btg4	-2.15588	-4.82254
1299	Btk	0.241133	2.259
1300	Btrc	-1.27882	0.127625
1301	Bub1b	-1.3813	-0.921339
1302	Bub3	0.625887	0.809562
1303	Bzw1	-2.39857	0.31467
1304	C030006K11Rik	2.33184	3.35246
1305	C030039L03Rik	-1.7523	-1.13481
1306	C1d	0.117006	2.01599
1307	C1galt1	-1.46523	1.82042
1308	C1qa	3.82624	7.13041
1309	C1qb	3.56381	2.55184
1310	C1qbp	2.29317	1.06292
1311	C1qc	3.85628	5.72135
1312	C1qtnf1	2.81228	3.51363
1313	C1qtnf3	-0.0106692	-0.658854
1314	C1qtnf4	-2.5848	-3.11597
1315	C1qtnf6	4.20464	5.06668
1316	C1qtnf7	0.834652	4.65662
1317	C1ra	2.6087	6.17751
1318	C1s1	2.05301	4.29918
1319	C2	3.03261	4.44119
1320	C230091D08Rik	-0.78065	2.22873
1321	C2cd2	-0.000436764	0.282471
1322	C2cd3	-1.70694	-0.701094
1323	C2cd4b	-2.12765	-2.41565
1324	C3	3.64299	4.30952
1325	C330006A16Rik	1.17541	1.32142
1326	C330007P06Rik	-0.574642	0.877777
1327	C330018D20Rik	-0.768454	0.961815
1328	C3ar1	0.660124	4.5233
1329	C4bp-ps1	-1.26451	-4.07899
1330	C530008M17Rik	-4.34081	-3.99312
1331	C5ar1	1.49244	4.7486
1332	C630043F03Rik	0.521098	1.99845
1333	C87436	-1.90273	-2.33048
1334	C8b	-1.53401	-2.88897
1335	Caap1	-0.777799	0.432642
1336	Cab39	-2.14551	-0.521114
1337	Cab39l	-2.3094	-2.36172
1338	Cabin1	0.764155	1.31559
1339	Cables1	2.39268	2.6299
1340	Cabs1	-6.0848	-9.83524
1341	Cabyr	-4.97426	-6.27417
1342	Cacfd1	1.23323	1.58821
1343	Cachd1	-0.0656372	3.78467
1344	Cacna1h	-1.42308	-1.90104
1345	Cacna2d1	-0.335892	3.52158
1346	Cacnb1	-2.08203	-4.62295
1347	Cacnb3	2.20951	5.00491
1348	Cacng5	-0.412731	2.98964
1349	Cacng8	-1.82255	-2.15633
1350	Cactin	1.07966	1.27295
1351	Cacul1	-2.59271	-2.06811
1352	Cadm1	-1.60618	-2.28505
1353	Cadm3	1.22047	4.94746
1354	Cadps	-0.298932	3.41493
1355	Cage1	-4.90629	-2.90199
1356	Calcoco1	1.85938	0.954687
1357	Cald1	0.606331	3.05969
1358	Calr3	-3.78666	-7.63364
1359	Calu	0.631438	3.13362
1360	Camk1	3.09178	4.0793
1361	Camk2d	0.507483	2.60218
1362	Camk2g	0.933589	1.56867
1363	Camk2n1	-1.5814	-2.82457
1364	Camk4	-2.01324	-7.57943
1365	Camkk2	1.16787	1.51705
1366	Camkmt	-0.712367	-1.5937
1367	Camkv	-1.16017	-2.71166
1368	Camsap1	-2.87024	-1.77683
1369	Camsap2	-2.59052	0.451623
1370	Camta2	0.857622	1.02333
1371	Cand1	-2.22147	-0.769176
1372	Cant1	0.38922	-2.48493
1373	Canx	-1.84505	-0.164289
1374	Cap1	0.69277	0.818412
1375	Cap2	-3.18319	-7.7367
1376	Capg	3.94674	4.36484
1377	Capn1	3.16565	3.04958
1378	Capn11	-3.29574	-5.5999
1379	Capn2	1.5529	2.41464
1380	Capn5	1.60475	5.56461
1381	Capn6	-0.833246	3.66099
1382	Capn7	-1.12699	0.860492
1383	Capns1	1.41885	0.953787
1384	Caprin1	-2.03314	-0.30252
1385	Caps2	-2.08202	-3.6469
1386	Capsl	-2.40898	-5.16916
1387	Capza2	-1.06215	1.67863
1388	Capza3	-5.08585	-6.11591
1389	Car11	0.827078	2.49436
1390	Car13	0.450986	3.62991
1391	Car15	-1.22463	-3.89223
1392	Car2	-3.70731	-1.83226
1393	Car3	0.423726	7.28081
1394	Card10	1.46267	3.81604
1395	Card6	-1.4953	-0.948144
1396	Carf	-2.16957	-1.90669
1397	Carhsp1	0.760067	0.215492
1398	Carkd	1.14149	1.47538
1399	Carns1	1.29585	4.43521
1400	Cars2	0.973103	0.835753
1401	Casc4	-2.22936	0.885617
1402	Casc5	-1.43621	-1.91729
1403	Casd1	-0.9712	2.20313
1404	Caskin2	1.94689	1.22431
1405	Casp12	0.218969	2.87036
1406	Casp3	0.433246	4.62067
1407	Casp4	0.201763	2.98984
1408	Casp6	2.1228	4.36847
1409	Casp7	1.23778	1.48995
1410	Casp8	0.706379	4.00754
1411	Casp9	1.76795	1.88591
1412	Cast	-3.71205	0.219596
1413	Cat	1.33525	2.90948
1414	Catsper1	-4.31762	-6.82017
1415	Catsper2	-4.59013	-2.82672
1416	Catsper3	-3.80856	-5.76543
1417	Catsperd	-3.30236	-2.91311
1418	Catsperg1	-4.12058	-3.31585
1419	Cav1	1.06536	3.92807
1420	Cav2	0.57485	4.71919
1421	Cbfa2t2	-0.199824	0.589904
1422	Cbfa2t3	1.56932	3.96845
1423	Cbl	-3.16842	-2.79708
1424	Cblb	-1.17911	-0.315027
1425	Cbll1	-1.42448	-1.85364
1426	Cbr1	1.73287	1.41458
1427	Cbr2	3.85937	5.14164
1428	Cbr3	2.72964	2.57068
1429	Cbr4	-1.13832	0.581577
1430	Cbs	3.56105	6.09724
1431	Cbwd1	-1.98565	-1.21637
1432	Cbx3	-0.934924	0.474559
1433	Cbx4	1.30659	1.6116
1434	Cbx5	-1.40342	0.70789
1435	Cbx6	2.37428	2.25761
1436	Cbx8	1.80093	0.967097
1437	Cby1	-0.359137	-1.24972
1438	Cc2d2a	0.31647	4.50385
1439	Ccbe1	0.0849506	2.45206
1440	Ccbl2	1.74047	2.71184
1441	Ccdc101	-1.8764	-1.84137
1442	Ccdc102a	1.92675	3.01024
1443	Ccdc103	-2.30169	-4.50775
1444	Ccdc105	-3.44919	-6.61745
1445	Ccdc106	-0.342134	-2.8525
1446	Ccdc107	2.96047	1.93972
1447	Ccdc108	-3.53437	-2.94605
1448	Ccdc109b	1.90117	2.2629
1449	Ccdc110	-4.06579	-4.88133
1450	Ccdc112	-1.6224	-1.39192
1451	Ccdc113	-4.45441	-2.5543
1452	Ccdc114	-1.05382	-2.30556
1453	Ccdc116	-3.9178	-7.37611
1454	Ccdc117	-2.41361	-2.29169
1455	Ccdc12	0.543536	1.07231
1456	Ccdc120	1.03058	1.51955
1457	Ccdc122	-0.176126	1.16701
1458	Ccdc127	-1.11285	1.74466
1459	Ccdc13	-3.16273	-3.85836
1460	Ccdc130	-1.44831	-1.14169
1461	Ccdc132	-1.44019	-0.192261
1462	Ccdc134	-0.589603	-0.963706
1463	Ccdc136	-4.46167	-1.65719
1464	Ccdc137	0.936152	1.61069
1465	Ccdc138	-2.32256	-2.14413
1466	Ccdc149	0.970529	4.82788
1467	Ccdc151	-2.5995	-5.08061
1468	Ccdc153	1.51238	2.67868
1469	Ccdc158	-3.60818	-2.27457
1470	Ccdc163	-1.49138	-2.07588
1471	Ccdc169	-4.15706	-6.22036
1472	Ccdc173	-3.8736	-3.06371
1473	Ccdc176	-4.63559	-2.15107
1474	Ccdc181	-4.14319	-2.1617
1475	Ccdc184	-2.6926	-5.26698
1476	Ccdc185	-4.3495	-9.16566
1477	Ccdc22	2.39293	3.4246
1478	Ccdc23	-1.12049	-2.14195
1479	Ccdc25	-1.81544	1.70027
1480	Ccdc28a	-1.70794	-2.23416
1481	Ccdc28b	2.99173	1.9029
1482	Ccdc3	1.71	5.97831
1483	Ccdc30	-4.85556	-3.32483
1484	Ccdc32	1.26182	1.06166
1485	Ccdc34	-1.71312	-0.974856
1486	Ccdc38	-4.87888	-2.7958
1487	Ccdc39	-4.14675	-2.36125
1488	Ccdc40	-3.21813	-3.64645
1489	Ccdc43	-0.00600322	1.55841
1490	Ccdc47	-1.43741	1.29137
1491	Ccdc50	-2.51994	-1.07843
1492	Ccdc51	2.02461	1.87789
1493	Ccdc54	-5.18289	-7.22288
1494	Ccdc55	-2.46012	-0.812237
1495	Ccdc57	-0.752803	-1.49666
1496	Ccdc58	-0.463192	0.654059
1497	Ccdc6	-1.09707	0.697064
1498	Ccdc62	-3.49702	-2.42301
1499	Ccdc63	-4.04604	-7.27523
1500	Ccdc65	-3.53992	-4.40326
1501	Ccdc66	-2.24509	-0.939432
1502	Ccdc67	-4.43375	-5.3131
1503	Ccdc69	1.90119	3.49982
1504	Ccdc70	-4.65642	-6.01405
1505	Ccdc74a	-2.65016	-3.1969
1506	Ccdc77	-1.9615	-0.946973
1507	Ccdc8	2.76342	5.49024
1508	Ccdc80	2.02328	3.88793
1509	Ccdc81	-4.32124	-5.91535
1510	Ccdc82	0.840759	0.733192
1511	Ccdc83	-4.18263	-3.84447
1512	Ccdc85b	2.24915	3.74734
1513	Ccdc87	-3.32055	-5.16607
1514	Ccdc88a	-2.74975	-1.04478
1515	Ccdc88b	-1.08399	-3.90855
1516	Ccdc88c	-2.60339	-2.82735
1517	Ccdc89	-4.24064	-4.12125
1518	Ccdc91	-3.47328	-4.16831
1519	Ccdc92	-3.31194	-3.62879
1520	Ccdc93	-0.9533	-0.665484
1521	Ccdc94	0.881064	0.623059
1522	Ccdc96	-4.01079	-3.74966
1523	Ccer1	-4.68656	-5.43458
1524	Cchcr1	-2.90928	-2.0251
1525	Ccl12	2.40756	6.86217
1526	Ccl27a	-2.32534	-1.54349
1527	Ccl28	-1.24833	-5.36153
1528	Ccl6	3.11684	3.84977
1529	Ccl8	2.71535	7.22139
1530	Ccl9	2.01074	5.68112
1531	Ccm2	2.07694	2.07751
1532	Ccm2l	1.02328	2.90274
1533	Ccna1	-3.78314	-3.25079
1534	Ccnb1	-2.34607	-1.60347
1535	Ccnb2	-2.741	-1.81481
1536	Ccnb3	-0.499918	2.57343
1537	Ccnc	-1.75869	-1.00547
1538	Ccnd1	1.17443	1.37742
1539	Ccnd2	0.953033	3.49898
1540	Ccndbp1	1.74236	2.58381
1541	Ccne2	-1.99961	0.79202
1542	Ccng1	-0.0128895	2.38089
1543	Ccnh	-1.33313	0.561859
1544	Ccni	-0.749396	-3.69887
1545	Ccnjl	0.819856	2.97817
1546	Ccnk	-2.89261	-2.69608
1547	Ccnt2	-0.849411	1.7025
1548	Ccny	-0.867693	1.2604
1549	Ccnyl1	-3.01264	-0.756939
1550	Ccp110	-3.72543	-1.88211
1551	Ccpg1	-2.15692	1.88108
1552	Ccr2	0.0824544	1.74554
1553	Ccs	1.31282	0.946951
1554	Ccser2	-3.23742	-2.09051
1555	Cct4	-2.32833	1.2878
1556	Cct6a	-0.804811	0.597915
1557	Cct6b	-4.47192	-3.13945
1558	Cct7	-0.653886	-0.584302
1559	Cct8	-2.29487	0.578457
1560	Cd14	3.26741	5.19969
1561	Cd151	2.48004	1.65806
1562	Cd163	0.421321	5.43256
1563	Cd164	-1.44279	0.698655
1564	Cd1d1	1.03884	5.23812
1565	Cd200	1.13934	2.65147
1566	Cd209f	2.13953	3.53895
1567	Cd209g	1.52846	4.12696
1568	Cd248	2.20702	2.46753
1569	Cd24a	1.0243	2.0134
1570	Cd2ap	-0.746575	2.23386
1571	Cd2bp2	0.93655	0.436551
1572	Cd302	0.964109	2.05331
1573	Cd33	-0.19915	2.49035
1574	Cd34	1.81609	2.89291
1575	Cd36	-0.759823	3.57392
1576	Cd38	0.517874	3.3185
1577	Cd3d	-1.53722	-6.41087
1578	Cd44	0.825956	1.53514
1579	Cd47	1.76511	3.85866
1580	Cd52	4.02796	3.64962
1581	Cd53	1.17305	4.47967
1582	Cd55	-2.76303	-3.97692
1583	Cd59a	0.90179	1.52192
1584	Cd68	3.23097	5.87289
1585	Cd74	4.37066	4.6604
1586	Cd81	2.67008	0.982269
1587	Cd82	2.1344	2.33828
1588	Cd83	2.39536	6.09254
1589	Cd84	-0.0439483	1.25738
1590	Cd86	0.397641	3.51753
1591	Cd93	0.676587	3.08741
1592	Cd96	-1.92385	-7.15302
1593	Cd99l2	1.84435	2.35147
1594	Cdadc1	-1.26875	1.59646
1595	Cdc123	-0.648632	1.10628
1596	Cdc14a	-4.0239	-0.00128721
1597	Cdc14b	-2.97469	1.54786
1598	Cdc16	0.629514	0.386895
1599	Cdc20	-1.02272	-1.31592
1600	Cdc25a	-1.57662	-1.29984
1601	Cdc25c	-2.03059	-2.53903
1602	Cdc26	1.03048	1.17969
1603	Cdc27	-3.21336	-3.77262
1604	Cdc34	-1.32198	-2.6131
1605	Cdc37	1.37739	1.42736
1606	Cdc37l1	-2.01273	-0.220324
1607	Cdc40	-1.1114	1.58629
1608	Cdc42	0.536255	1.58594
1609	Cdc42bpb	1.37865	2.18637
1610	Cdc42ep2	1.74368	1.15078
1611	Cdc42ep3	-2.72901	-2.55291
1612	Cdc42ep4	0.44887	-0.500439
1613	Cdc42ep5	2.9532	2.54909
1614	Cdc42se1	0.712516	-0.106954
1615	Cdc42se2	0.984746	2.31877
1616	Cdc5l	-1.51631	0.513275
1617	Cdc73	-1.7133	-1.17813
1618	Cdca2	-3.70051	-3.99
1619	Cdca3	-2.1744	-1.59152
1620	Cdca5	-0.826782	-2.02631
1621	Cdca8	-0.876646	-1.23662
1622	Cdh13	-0.585058	-1.8072
1623	Cdh2	-0.969408	-0.733233
1624	Cdh26	-0.974161	-4.62333
1625	Cdhr2	-0.772311	-1.83595
1626	Cdipt	1.5613	2.07804
1627	Cdk12	-1.56663	-0.846118
1628	Cdk16	1.07583	0.806056
1629	Cdk20	-1.11516	-1.67445
1630	Cdk2ap1	1.27354	0.768769
1631	Cdk2ap2	2.75192	3.0772
1632	Cdk3-ps	0.344106	1.11874
1633	Cdk4	2.92571	3.12019
1634	Cdk5	1.85482	2.5858
1635	Cdk5rap1	0.570033	1.1475
1636	Cdk5rap2	-1.51196	-3.55785
1637	Cdk8	-1.31979	0.762127
1638	Cdk9	1.11346	1.30201
1639	Cdkal1	-3.03439	-0.746137
1640	Cdkl2	-3.88171	-1.96915
1641	Cdkl3	-4.69522	-2.91845
1642	Cdkl4	-2.96478	-4.25183
1643	Cdkn1a	1.69422	2.28521
1644	Cdkn1c	0.58354	-6.61455
1645	Cdkn2aipnl	1.29277	1.89444
1646	Cdkn2c	-1.09114	-3.10133
1647	Cdkn2d	-0.772606	-1.20391
1648	Cdkn3	-3.91162	-2.148
1649	Cdon	1.10899	5.08216
1650	Cdpf1	0.54521	-0.857278
1651	Cdr2	-2.07104	-1.59704
1652	Cdr2l	2.00869	4.46581
1653	Cds1	-2.54723	-2.87183
1654	Cds2	0.780766	1.68812
1655	Cdsn	-1.4629	-3.23042
1656	Cdt1	1.68819	2.07281
1657	Cdv3	-2.49767	-2.63599
1658	Cdyl	-3.10607	-3.85337
1659	Cebpa	3.48948	4.44694
1660	Cebpb	4.35657	1.22296
1661	Cebpd	2.87593	3.06824
1662	Cebpg	-2.44151	-1.96648
1663	Cebpz	-1.85312	1.20414
1664	Cela1	2.07518	3.22462
1665	Cela3b	2.24066	5.12647
1666	Celf2	-0.772632	1.56615
1667	Celf4	-0.557582	-0.869435
1668	Celf5	-2.67706	-6.05208
1669	Celsr1	1.01262	5.83663
1670	Celsr2	-0.907525	-4.15562
1671	Cemip	-0.962873	-4.53153
1672	Cenpa	1.84145	2.3991
1673	Cenpc1	-2.38369	-1.56357
1674	Cenpe	-2.27187	-1.70718
1675	Cenpj	-2.02004	-1.4236
1676	Cenpk	-2.12974	-1.0698
1677	Cenpl	-2.02789	-0.893868
1678	Cenpn	-3.23236	-2.32539
1679	Cenpp	-2.24016	-1.17291
1680	Cenpu	-2.94541	-2.54644
1681	Cenpv	-1.34543	-1.34899
1682	Cenpw	-1.94752	0.477557
1683	Cep104	-1.90388	-1.80232
1684	Cep112	-4.7252	-5.49703
1685	Cep128	-4.36959	-3.07258
1686	Cep131	-0.849027	-1.95238
1687	Cep162	-2.41472	-2.73827
1688	Cep164	-1.72504	-3.0038
1689	Cep170	-2.93524	-1.46006
1690	Cep19	-2.05735	-1.24365
1691	Cep192	-2.43346	-1.82851
1692	Cep290	-2.72351	-1.20522
1693	Cep44	-1.14289	-1.25985
1694	Cep55	-2.64328	-1.33633
1695	Cep57	-4.18357	-3.47113
1696	Cep57l1	-2.81355	-2.86832
1697	Cep63	-4.23525	-1.75371
1698	Cep68	0.251468	1.06523
1699	Cep70	-2.67411	-2.06543
1700	Cep72	-3.48073	-3.18477
1701	Cep76	-1.60942	-4.03868
1702	Cep78	-0.438675	0.773291
1703	Cep83	-3.94422	-1.78761
1704	Cep83os	-3.03836	-1.53942
1705	Cep85	-1.69236	-1.05774
1706	Cep89	-1.97998	-3.01475
1707	Cep95	-2.88325	-2.01502
1708	Cercam	1.02582	1.47722
1709	Cers2	2.19335	3.07083
1710	Cers3	-3.41866	-1.56654
1711	Cers4	2.10013	3.45177
1712	Cers5	1.81208	1.52363
1713	Ces1d	1.08835	3.99323
1714	Ces2g	2.87021	4.71436
1715	Cetn1	-4.81239	-2.84742
1716	Cetn2	0.00867898	1.92206
1717	Cetn3	-2.16238	-0.695354
1718	Cetn4	-4.29039	-2.84399
1719	Cfb	2.2574	4.26208
1720	Cfd	1.51274	5.62473
1721	Cfh	1.17898	4.56716
1722	Cfi	0.990989	7.36695
1723	Cfl1	1.52601	1.43242
1724	Cfl2	-1.05005	0.665291
1725	Cflar	0.288779	3.11919
1726	Cfp	3.92385	5.08034
1727	Cftr	-2.482	-2.7516
1728	Cggbp1	-0.703205	0.061114
1729	Cgn	0.380833	1.90689
1730	Cgnl1	-0.406929	-2.76884
1731	Cgrrf1	-1.20744	-1.66615
1732	Chac1	0.187174	-2.06288
1733	Champ1	0.0695517	1.81004
1734	Chchd1	0.958734	1.234
1735	Chchd10	2.84098	1.56042
1736	Chchd3	-0.890245	-2.4349
1737	Chchd4	0.930835	1.12764
1738	Chchd5	1.51209	1.73956
1739	Chchd6	-1.34199	-1.13402
1740	Chchd7	-0.577631	-0.718968
1741	Chd1	-1.76026	-2.05244
1742	Chd1l	-1.89317	-1.01302
1743	Chd2	-0.690048	1.38
1744	Chd3	-0.359315	1.65617
1745	Chd5	-4.18983	-4.38593
1746	Chd6	-0.521234	2.64043
1747	Chd7	-1.04695	-1.16002
1748	Chd8	-0.612383	1.27171
1749	Chd9	-0.572844	2.6582
1750	Chdh	-0.00116169	0.830048
1751	Chek1	-1.20753	-2.35411
1752	Chek2	0.893436	1.94476
1753	Chfr	-1.54122	-0.866869
1754	Chga	-1.39187	-3.08279
1755	Chgb	-1.48044	-2.96488
1756	Chic2	-0.836719	0.114955
1757	Chid1	0.749172	0.0630724
1758	Chka	-0.757584	1.53356
1759	Chl1	-4.79552	-6.79152
1760	Chm	-0.279588	2.53735
1761	Chmp1b	-1.21985	1.64713
1762	Chmp2b	-1.73674	-1.51575
1763	Chmp3	-0.145245	1.81795
1764	Chmp4b	0.783523	0.77194
1765	Chmp4c	0.109541	2.78784
1766	Chmp5	-0.9808	1.18166
1767	Chmp7	1.1235	1.33942
1768	Chn1	-2.8492	-3.82939
1769	Chn2	-4.18062	-2.04209
1770	Chordc1	-1.1541	1.37147
1771	Chp1	0.621175	0.107062
1772	Chpf	1.79245	2.44804
1773	Chpf2	2.2686	2.89313
1774	Chpt1	-1.9163	0.696247
1775	Chrac1	-1.37886	-1.15236
1776	Chrdl1	-0.624177	2.01777
1777	Chrdl2	1.09705	1.62691
1778	Chrna5	-1.51272	-6.09672
1779	Chrnb1	0.455984	2.11428
1780	Chrne	-3.11076	-6.66165
1781	Chst1	-1.65184	-2.07779
1782	Chst11	0.939891	5.71675
1783	Chst12	2.73288	1.95718
1784	Chst14	2.31701	3.13796
1785	Chst15	0.958092	3.59321
1786	Chst2	0.915849	3.07348
1787	Chst8	2.34429	2.2956
1788	Chsy1	0.698883	2.45851
1789	Chtf8	1.65526	3.53742
1790	Chuk	-0.758351	0.698291
1791	Churc1	1.09077	1.00249
1792	Ciao1	0.99126	1.30305
1793	Cib2	1.8542	-2.67557
1794	Cib4	-3.67359	-8.15458
1795	Cic	0.791085	1.12065
1796	Cidea	1.69086	3.3971
1797	Cinp	0.89378	1.09288
1798	Cipc	-1.26854	-2.04884
1799	Cir1	-3.34477	-2.68145
1800	Cirh1a	-0.346229	1.29456
1801	Cit	-1.90858	-1.53388
1802	Cited2	1.53556	1.9498
1803	Ciz1	-0.618655	-0.627719
1804	Ckap2l	-3.14942	-1.57041
1805	Ckap4	-0.309098	-0.683222
1806	Ckap5	-2.58887	-0.263868
1807	Ckb	3.34794	3.62927
1808	Cklf	-2.84644	-1.85249
1809	Ckmt2	-2.50952	-7.1662
1810	Cks1b	2.07842	3.05439
1811	Clasp1	-2.39826	1.68634
1812	Clasp2	-0.661731	0.619929
1813	Clasrp	-0.13178	-1.69843
1814	Clcc1	-0.476021	1.07796
1815	Clcf1	0.65719	1.10727
1816	Clcn2	1.43764	1.68699
1817	Clcn3	-1.94914	-1.59975
1818	Clcn4-2	-0.60894	0.931784
1819	Clcn7	1.7634	2.40647
1820	Clcnka	0.364707	-1.33616
1821	Cldn10	1.72945	3.23099
1822	Cldn12	0.383785	2.12858
1823	Cldn3	-1.49692	-2.17031
1824	Cldn5	2.87071	3.67119
1825	Cldnd2	-3.97686	-8.87157
1826	Clec10a	3.02882	5.39822
1827	Clec11a	0.599255	1.87326
1828	Clec14a	1.0193	4.07301
1829	Clec2d	3.0174	3.92029
1830	Clec4a2	0.011023	-3.54436
1831	Clec4a3	0.761502	4.79727
1832	Clec4d	1.01924	3.34871
1833	Clec4g	-1.78921	-2.67244
1834	Clec4n	2.11293	4.68877
1835	Clec7a	0.617313	4.34516
1836	Clgn	-4.9458	-2.63738
1837	Clhc1	-0.913919	-3.01244
1838	Clic1	2.4018	2.23867
1839	Clic3	2.06048	2.56643
1840	Clic5	0.1913	3.9149
1841	Clint1	-0.611188	1.41202
1842	Clip1	-2.49104	-1.45124
1843	Clip3	2.14611	3.14112
1844	Clip4	-3.83182	-4.02163
1845	Clk1	-0.702189	1.77826
1846	Clk4	-2.43553	-2.35483
1847	Clmn	-3.63167	-9.31422
1848	Cln3	1.22781	1.92931
1849	Cln5	1.24425	4.31108
1850	Cln8	1.61848	1.23189
1851	Clns1a	0.00366227	0.579364
1852	Clp1	-1.77082	-1.51079
1853	Clpb	-2.20319	-2.91375
1854	Clpp	2.31816	2.09161
1855	Clptm1	0.957318	1.67444
1856	Clpx	-3.23868	-2.43712
1857	Clstn1	1.17223	1.59307
1858	Clta	3.05117	2.78916
1859	Cltc	-1.80427	1.17583
1860	Clu	2.47649	0.611233
1861	Cluap1	-1.95917	-1.3108
1862	Cluh	0.760731	0.876833
1863	Cmbl	2.14776	2.75249
1864	Cmc2	0.370031	0.791998
1865	Cmip	1.12188	3.0528
1866	Cmklr1	-1.09704	-2.88273
1867	Cml1	1.87534	2.61476
1868	Cmss1	0.808231	-2.21667
1869	Cmtm1	-3.1806	-3.08028
1870	Cmtm3	3.60529	6.04794
1871	Cmtm4	0.794209	2.13154
1872	Cmtm6	0.704468	1.04858
1873	Cmtm7	3.38615	2.95757
1874	Cmtr1	0.517328	1.02039
1875	Cmya5	-0.00472479	-1.49856
1876	Cnbp	-0.101098	0.792757
1877	Cndp2	1.60017	0.796007
1878	Cnep1r1	-1.15547	1.15582
1879	Cnih1	1.79638	3.21577
1880	Cnih4	1.30912	2.44225
1881	Cnn2	2.76041	2.67102
1882	Cnn3	2.92316	4.45531
1883	Cnnm2	1.63862	2.43079
1884	Cnnm3	1.53597	0.969538
1885	Cnnm4	-0.659282	-1.77166
1886	Cnot10	-0.350239	0.732927
1887	Cnot2	-2.17482	-0.284841
1888	Cnot4	-3.27951	-0.672143
1889	Cnot6	-1.56578	-0.523913
1890	Cnot6l	-0.697349	1.65232
1891	Cnot7	-1.27279	0.09381
1892	Cnot8	1.15961	2.15988
1893	Cnp	3.3049	3.00382
1894	Cnppd1	-0.0425803	-0.521357
1895	Cnpy2	2.88942	4.15782
1896	Cnpy3	1.69801	2.87485
1897	Cnpy4	0.877141	2.9016
1898	Cnrip1	1.37023	4.8157
1899	Cntn6	-1.22639	-5.3643
1900	Cntnap2	-1.82863	-2.41466
1901	Cntrl	-2.15151	-0.86859
1902	Cntrob	-0.829086	-1.19299
1903	Coa3	1.60581	1.10443
1904	Coa5	-0.59984	0.548311
1905	Coa6	1.15902	0.815879
1906	Coa7	1.51756	2.02322
1907	Coasy	1.90868	1.46452
1908	Cobll1	0.33155	2.61571
1909	Cog1	-0.781175	-1.10344
1910	Cog2	0.91557	1.36817
1911	Cog6	-2.77501	-1.55425
1912	Cog7	-0.471663	-0.990534
1913	Cog8	-0.516102	-1.72763
1914	Coil	-3.15704	-2.68317
1915	Col15a1	0.591279	4.07585
1916	Col16a1	-1.08558	-2.99262
1917	Col18a1	2.33059	3.40797
1918	Col1a1	2.93738	2.49529
1919	Col1a2	2.94288	3.38141
1920	Col20a1	-1.96174	-4.29182
1921	Col22a1	-2.90512	-0.661161
1922	Col23a1	0.719955	-0.311559
1923	Col27a1	-0.686726	1.21348
1924	Col2a1	-2.11496	-5.11258
1925	Col3a1	2.63265	4.49909
1926	Col4a1	2.68548	2.53464
1927	Col4a2	2.57274	2.19912
1928	Col4a3	-0.481482	1.13384
1929	Col4a3bp	-2.54742	-1.357
1930	Col4a4	0.0776592	1.70486
1931	Col4a5	1.0718	2.84486
1932	Col4a6	0.25775	4.3986
1933	Col5a1	0.669562	1.97039
1934	Col5a2	0.726329	4.61125
1935	Col6a1	3.39775	3.52967
1936	Col6a2	3.17556	3.76654
1937	Col6a3	1.14864	2.35492
1938	Col6a4	0.0910533	-2.45947
1939	Colec11	1.41215	4.42425
1940	Colec12	0.351034	3.53443
1941	Commd10	0.599293	1.16904
1942	Commd2	1.46227	1.4837
1943	Commd4	2.31481	4.13608
1944	Commd5	1.37315	1.03985
1945	Commd6	1.6866	2.03592
1946	Commd7	1.83572	2.85523
1947	Commd9	1.52167	1.01106
1948	Comp	-3.40292	-4.15081
1949	Comt	2.7173	3.27659
1950	Comtd1	3.04854	4.03119
1951	Copa	0.603221	1.45272
1952	Copb1	-1.60557	1.13331
1953	Copb2	-0.453734	1.29465
1954	Cope	2.46981	1.68915
1955	Copg1	0.604134	1.2499
1956	Coprs	-0.72332	-0.890113
1957	Cops2	-2.36658	1.40324
1958	Cops4	-1.62504	-0.612173
1959	Cops5	-2.00712	0.823271
1960	Copz1	1.2428	1.242
1961	Copz2	3.43583	4.3175
1962	Coq7	0.482915	1.12105
1963	Coq9	1.06586	0.891034
1964	Corin	-2.08926	-2.74982
1965	Coro1a	3.4707	5.46775
1966	Coro1b	2.09689	1.7878
1967	Coro1c	1.77824	1.52135
1968	Coro2a	-1.19789	-1.36735
1969	Coro7	1.05573	1.19887
1970	Cox15	0.487649	2.89806
1971	Cox17	1.02281	0.852591
1972	Cox18	0.780269	1.36901
1973	Cox19	0.594446	0.729933
1974	Cox5b	0.96657	0.897855
1975	Cox6a1	2.14661	1.1263
1976	Cox6b1	3.10798	2.24928
1977	Cox6b2	-2.60006	-1.68504
1978	Cox6c	1.01708	0.719633
1979	Cox7a1	2.93404	3.76969
1980	Cox7a2l	1.29161	0.706991
1981	Cox7c	0.871415	1.38716
1982	Cox8a	2.91727	4.13392
1983	Cp	-0.227331	4.0371
1984	Cpa5	-3.73998	-7.62249
1985	Cpd	-1.24807	2.27572
1986	Cpe	2.2984	0.755877
1987	Cpeb2	-3.97867	-1.03267
1988	Cpeb3	-3.06692	0.492425
1989	Cpeb4	-2.51715	-2.70714
1990	Cped1	-0.013828	1.13388
1991	Cplx1	-0.447822	-1.00011
1992	Cplx2	0.681991	4.81346
1993	Cpne5	-0.0738733	-4.09154
1994	Cpne7	0.151732	-6.20785
1995	Cpne8	1.80997	4.10129
1996	Cpox	0.743709	1.97692
1997	Cpped1	0.930412	1.63447
1998	Cpq	2.00977	1.61143
1999	Cpsf2	-1.59359	0.965222
[truncated: 6,911 more rows]
