# Supplementary material for: Sox9 and Sox8 protect the adult testis from male-to-female genetic reprogramming and complete degeneration
Source: eLife. 2016 Jun 21;5:e15635. doi: 10.7554/eLife.15635 (PMC4945155; doi:10.7554/eLife.15635)
Supplement: Figure 5—source data 2. — DOI: http://dx.doi.org/10.7554/eLife.15635.023 [file elife-15635-fig5-data2.xls]

## Sheet: RAapo.csv
V1	V2.x	V2.y
1709	Bid	1.11444	2.02236
1975	Casp3	0.433246	4.62067
1980	Casp8	0.706379	4.00754
1981	Casp9	1.76795	1.88591
2450	Cflar	0.288779	2.82542
2451	Cflar	0.288779	2.61511
2452	Cflar	0.288779	4.12136
2453	Cflar	0.288779	2.91486
3099	Cycs	0.391801	0.941798
3100	Cycs	0.391801	1.4517
3101	Cycs	0.391801	1.57482
3405	Dlgap3	-0.576092	-1.15019
3995	Fadd	1.5859	2.70734
5362	Ifngr1	0.389733	0.572644
5363	Ifngr2	1.53247	-2.00872
7831	Parp11	-1.50596	0.77646
7832	Parp11	-1.50596	1.45251
7833	Parp14	0.158228	4.48701
7835	Parp3	1.84096	2.64658
7836	Parp3	1.84096	2.2974
7837	Parp3	1.84096	2.98271
7838	Parp4	1.17698	2.28396
7839	Parp9	0.495	4.8074
9022	Rarg	2.12169	1.64877
