# Supplementary material for: Sox9 and Sox8 protect the adult testis from male-to-female genetic reprogramming and complete degeneration
Source: eLife. 2016 Jun 21;5:e15635. doi: 10.7554/eLife.15635 (PMC4945155; doi:10.7554/eLife.15635)
Supplement: Figure 5—source data 3. — DOI: http://dx.doi.org/10.7554/eLife.15635.024 [file elife-15635-fig5-data3.xls]

## Sheet: Win
Treated with Win18466					Not treated with Win18466
103b	110b	111b	116b	105b	104b	106b	109b	112b	114b
2	0	2	7	1	2	7	13	6	3
3	4	2	3	1	4	5	12	5	9
0	3	0	2	2	7	5	6	9	10
1	10	2	4	1	3	7	8	4	4
1	0	1	0	2	2	3	10	10	7
2	8	0	5	0	1	4	5	11	5
0	2	1	1	2	3	4	8	10	6
1	3	0	3	3	3	10	9	10	12
1	0	1	1	4	2	2	11	4	10
3	0	1	1	0	0	9	6	11	5
4	0	1	0	3	5	11	5	9	13
4	0	6	1	0	3	11	12	3	7
1	3	2	2	2	0	15	6	14	5
1	2	4	1	1	4	6	9	7	11
2	3	4	5	2	2	11	4	3	10
0	3	0	0	1	3	14	5	4	9
1	3	0	2	3	3	5	12	5	7
0	2	1	8	1	4	4	11	7	6
1	6	1	0	1	1	9	4	13	6
0	5	6	1	3	2	8	8	9	5
4	2	0	0	2	3	3	11	8	5
2	1	0	4	0	3	2	8	5	12
0	1	0	1	0	2	9	8	1	9
1	2	0	4	0	2	3	12	5	4
4	13	1	9	2	5	3	5	4	6
2	1	0	2	0	1	7	9	8	10
1	2	0	2	1	1	4	4	3	9
1	0	0	3	0	3	7	17	7	10
1	4	1	3	1	4	2	9	6	11
2	7	0	3	0	1	8	4	4	6
0	1	0	4	0	2	4	11	4	13
1	0	0	5	2	3	2	4	3	8
1	4	3	1	2	5	12	7	8	11
6	3	0	2	0	4	6	6	4	7
4	0	0	0	0	5	8	14	3	6
2	0	0	0	1	6	9	6	15	9
3	0	1	0	1	8	16	7	5	2
5	2	1	2	1	6	4	5	6	4
3	2	1	1	1	8	8	7	14	9
1	1	1	0	2	6	6	6	6	11
Total:		361					1314
Mean:		1.805					6.57
stdev:		2.03165					3.5238
		Variance	Mean
	Treated	P-Value	P-Value
	Untreated	1.662e-13	6.96937e-45
		unequal	different
	Levene test's for variance equality
	Made with leveneTest(y,group) function from "car" R package
	T-tests for mean comparison made in the gnumeric speadsheet

## Sheet: Treated-Untreated
	Treated	Untreated
Mean	1.805	6.57
Variance	4.12761	12.4172
Observations	200	200
Hypothesized Mean Difference	0
Observed Mean Difference	-4.765
df	318.136
t Stat	-16.5671
P (T<=t) one-tail	3.52277e-45
t Critical one-tail	1.64966
P (T<=t) two-tail	7.04555e-45
t Critical two-tail	1.96745
Power test:
> pwr.t.test(n=200,d=(1.805-6.57)/sqrt(13.94),power=NULL,sig.level=.05,type="two.sample",alternative="two.sided")
Two-sample t test power calculation
n = 200
d = 1.276238
sig.level = 0.05
power = 1
alternative = two.sided
NOTE: n is number in *each* group
