# Supplementary material for: Sox9 and Sox8 protect the adult testis from male-to-female genetic reprogramming and complete degeneration
Source: eLife. 2016 Jun 21;5:e15635. doi: 10.7554/eLife.15635 (PMC4945155; doi:10.7554/eLife.15635)
Supplement: Figure 6—source data 1. — DOI: http://dx.doi.org/10.7554/eLife.15635.026 [file elife-15635-fig6-data1.xls]

## Sheet: Hoja1
	raw counts	Sox9/8 DKO (Sox9)			Sox9/8 DKO (Wt1)			Control TX
	Individual ID	205A	206A	45B	224A	276A	277A	107A	318A	431A
		10	31	42	12	20	13	12	4	3
	Number of	8	22	40	8	18	12	5	1	6
	Apoptotic cells/	8	30	32	37	19	19	5	2	7
	micrograph	11	22	33	18	26	16	6	1	3
	(0.55 mm2)	8	17	32	18	11	18	15	3	9
		10	22	41	19	20	15	10	6	0
		8	24	37	20	19	12	8	7	7
	Total N. of cells	488			370			120
	Total area analysed per condition: 21*0.55=11.55 mm2
	Pairwise comparisons:
	tests performed with the chisq.test() function in R. Sample sizes higher than the minimum of 50 recommended for this type of tests
	Sox9/8 DKO (Sox9) vs. Sox9/8 DKO (Wt1)				X-squared = 16.228, df = 1, p-value = 5.614e-05
	Sox9/8 DKO (Sox9) vs. Control TX				X-squared = 222.74, df = 1, p-value < 2.2e-16
	Sox9/8 DKO (Wt1) vs Control TX				X-squared = 127.55, df = 1, p-value < 2.2e-16
	Bonferroni correction for multiple testing do not alter the results as p<0.05/3 in all comparisons
